# Supplementary material for: A plethora of structural transitions, distortions and modulations in Cu-doped BiMn7O12 quadruple perovskites
Source: Royal Society of Chemistry journal article supplement (doi:10.1039/d1tc02344f), 2021-01-01
Supplement: d1tc02344f1.pdf [file d1tc02344f1.pdf]

## Supporting Information (Online Material) for

### Plethora of Structural Transitions, Distortions and Modulations in Cu-doped BiMn<sub>7</sub>O<sub>12</sub> Quadruple Perovskites

Alexei A. Belik,<sup>\*,a</sup> Yoshitaka Matsushita,<sup>b</sup> Masahiko Tanaka,<sup>b</sup> Roger D. Johnson,<sup>c</sup> and  
Dmitry D. Khalyavin<sup>d</sup>

<sup>a</sup> *International Center for Materials Nanoarchitectonics (WPI-MANA), National Institute for Materials Science (NIMS), Namiki 1-1, Tsukuba, Ibaraki 305-0044, Japan.*

<sup>b</sup> *Material Analysis Station, National Institute for Materials Science (NIMS), Sengen 1-2-1, Tsukuba, Ibaraki 305-0047, Japan.*

<sup>c</sup> *Department of Physics and Astronomy, University College London, Gower Street, London, WC1E 6BT, United Kingdom*

<sup>d</sup> *ISIS Facility, Rutherford Appleton Laboratory, Chilton, Didcot, OX11 0QX, United Kingdom*

**\* E-mail: Alexei.Belik@nims.go.jp**

Table S1. Structure parameters of BiCu<sub>0.5</sub>Mn<sub>6.5</sub>O<sub>12</sub> at 50 K, 300 K and 400 K from neutron powder diffraction data in the average models

| Site                                      | WP          | <i>x</i>   | <i>y</i>    | <i>z</i>    | <i>U</i> (Å <sup>2</sup> ) |
|-------------------------------------------|-------------|------------|-------------|-------------|----------------------------|
| <i>T</i> = 50 K, space group <i>I2/m</i>  |             |            |             |             |                            |
| Bi                                        | 2 <i>a</i>  | 0          | 0           | 0           | 0.0498(16)                 |
| Mn1                                       | 2 <i>c</i>  | 0.5        | 0           | 0           | 0.0208(18)                 |
| Mn2                                       | 2 <i>d</i>  | 0.5        | 0.5         | 0           | = <i>U</i> (Mn1)           |
| Mn3                                       | 2 <i>b</i>  | 0          | 0.5         | 0           | = <i>U</i> (Mn1)           |
| <b>Mn4</b>                                | 4 <i>e</i>  | 0.75       | 0.25        | 0.75        | 0.0109(8)                  |
| <b>Mn5</b>                                | 4 <i>f</i>  | 0.25       | 0.25        | 0.75        | = <i>U</i> (Mn4)           |
| O1                                        | 8 <i>j</i>  | 0.0020(11) | 0.1760(13)  | 0.6887(16)  | 0.0141(6)                  |
| O2                                        | 4 <i>i</i>  | 0.6901(12) | 0           | 0.8241(17)  | = <i>U</i> (O1)            |
| O3                                        | 4 <i>i</i>  | 0.3119(13) | 0           | 0.8202(19)  | = <i>U</i> (O1)            |
| O4                                        | 8 <i>j</i>  | 0.1758(8)  | 0.6896(15)  | 0.0060(9)   | = <i>U</i> (O1)            |
| <i>T</i> = 300 K, space group <i>I2/m</i> |             |            |             |             |                            |
| Bi                                        | 2 <i>a</i>  | 0          | 0           | 0           | 0.0441(15)                 |
| Mn1                                       | 2 <i>c</i>  | 0.5        | 0           | 0           | 0.0203(18)                 |
| Mn2                                       | 2 <i>d</i>  | 0.5        | 0.5         | 0           | = <i>U</i> (Mn1)           |
| Mn3                                       | 2 <i>b</i>  | 0          | 0.5         | 0           | = <i>U</i> (Mn1)           |
| <b>Mn4</b>                                | 4 <i>e</i>  | 0.75       | 0.25        | 0.75        | 0.0116(8)                  |
| <b>Mn5</b>                                | 4 <i>f</i>  | 0.25       | 0.25        | 0.75        | = <i>U</i> (Mn4)           |
| O1                                        | 8 <i>j</i>  | 0.0030(7)  | 0.1751(10)  | 0.6887(9)   | 0.0156(6)                  |
| O2                                        | 4 <i>i</i>  | 0.6913(9)  | 0           | 0.8251(10)  | = <i>U</i> (O1)            |
| O3                                        | 4 <i>i</i>  | 0.3137(10) | 0           | 0.8196(12)  | = <i>U</i> (O1)            |
| O4                                        | 8 <i>j</i>  | 0.1766(7)  | 0.6898(12)  | 0.0073(6)   | = <i>U</i> (O1)            |
| <i>T</i> = 400 K, space group <i>Im-3</i> |             |            |             |             |                            |
| Bi                                        | 2 <i>a</i>  | 0          | 0           | 0           | 0.0460(15)                 |
| Mn1                                       | 6 <i>b</i>  | 0          | 0.5         | 0.5         | 0.0206(18)                 |
| <b>Mn2</b>                                | 8 <i>c</i>  | 0.25       | 0.25        | 0.25        | 0.0138(8)                  |
| O                                         | 24 <i>g</i> | 0          | 0.31069(14) | 0.17626(15) | 0.0189(6)                  |

WP: Wyckoff position. Octahedral sites are marked by bold, blue letters.

**At 50 K:** Space group  $I2/m$  (No. 12, unique axis  $b$ , cell choice 3),  $Z = 2$ .  $g(\text{Bi}) = g(\text{Mn4}) = g(\text{Mn5}) = g(\text{O1}) = g(\text{O2}) = g(\text{O3}) = g(\text{O4}) = 1$ , and Mn1, Mn2, and Mn3 are occupied by  $0.8333\text{Mn}+0.1667\text{Cu}$ .  $g$  is the occupation factor.

$a = 7.42439(18) \text{ \AA}$ ,  $b = 7.4431(2) \text{ \AA}$ ,  $c = 7.4403(3) \text{ \AA}$ ,  $\beta = 90.2709(18)^\circ$ , and  $V = 411.15(2) \text{ \AA}^3$ ;  $R_{\text{wp}} = 7.20 \%$ ,  $R_{\text{p}} = 5.73 \%$ .

**At 300 K:** Space group  $I2/m$  (No. 12, unique axis  $b$ , cell choice 3),  $Z = 2$ .  $g(\text{Bi}) = g(\text{Mn4}) = g(\text{Mn5}) = g(\text{O1}) = g(\text{O2}) = g(\text{O3}) = g(\text{O4}) = 1$ , and Mn1, Mn2, and Mn3 are occupied by  $0.8333\text{Mn}+0.1667\text{Cu}$ .  $g$  is the occupation factor.

$a = 7.43419(17) \text{ \AA}$ ,  $b = 7.44493(14) \text{ \AA}$ ,  $c = 7.44850(18) \text{ \AA}$ ,  $\beta = 90.4203(15)^\circ$ , and  $V = 412.241(16) \text{ \AA}^3$ ;  $R_{\text{wp}} = 6.66 \%$ ,  $R_{\text{p}} = 5.46 \%$ .

**At 400 K:** Space group  $Im-3$  (No 204);  $Z = 2$ .  $g(\text{Bi}) = g(\text{Mn2}) = g(\text{O}) = 1$ , and Mn1 is occupied by  $0.8333\text{Mn}+0.1667\text{Cu}$ .  $g$  is the occupation factor.

$a = 7.44784(3) \text{ \AA}$  and  $V = 413.134(3) \text{ \AA}^3$ ;  $R_{\text{wp}} = 7.26 \%$ ,  $R_{\text{p}} = 6.30 \%$ .

Table S2. Bond lengths, bond-valence sum (BVS), and distortion parameters of MnO<sub>6</sub> ( $\Delta$ ) in BiCu<sub>0.5</sub>Mn<sub>6.5</sub>O<sub>12</sub> at 50 K, 300 K and 400 K

| <i>T</i> = 50 K, space group <i>I2/m</i>  |            |                           |                      |
|-------------------------------------------|------------|---------------------------|----------------------|
| Bi-O2 $\times 2$                          | 2.642(10)  | Mn3-O4 $\times 4$         | 1.923(9)             |
| Bi-O1 $\times 4$                          | 2.661(11)  | Mn3-O3 $\times 2$         | 2.767(10)            |
| Bi-O3 $\times 2$                          | 2.680(11)  | Mn3-O2 $\times 2$         | 2.788(10)            |
| Bi-O4 $\times 4$                          | 2.654(10)  | BVS(Mn3)                  | +2.83                |
| BVS(Bi)                                   | +2.58      | <b>Mn4</b> -O4 $\times 2$ | 1.947(7)             |
| Mn1-O2 $\times 2$                         | 1.929(11)  | <b>Mn4</b> -O2 $\times 2$ | 1.992(4)             |
| Mn1-O3 $\times 2$                         | 1.929(12)  | <b>Mn4</b> -O1 $\times 2$ | 2.005(9)             |
| Mn1-O1 $\times 4$                         | 2.790(12)  | BVS(Mn4)                  | +3.31                |
| BVS(Mn1)                                  | +2.78      | $\Delta$ (Mn4)            | $1.6 \times 10^{-4}$ |
| Mn2-O1 $\times 4$                         | 1.920(11)  | <b>Mn5</b> -O1 $\times 2$ | 1.973(9)             |
| Mn2-O4 $\times 4$                         | 2.791(11)  | <b>Mn5</b> -O3 $\times 2$ | 1.986(4)             |
| BVS(Mn2)                                  | +2.84      | <b>Mn5</b> -O4 $\times 2$ | 2.036(7)             |
|                                           |            | BVS(Mn5)                  | +3.16                |
|                                           |            | $\Delta$ (Mn5)            | $1.8 \times 10^{-4}$ |
| <i>T</i> = 300 K, space group <i>I2/m</i> |            |                           |                      |
| Bi-O2 $\times 2$                          | 2.630(7)   | Mn3-O4 $\times 4$         | 1.929(7)             |
| Bi-O1 $\times 4$                          | 2.660(7)   | Mn3-O3 $\times 2$         | 2.764(8)             |
| Bi-O3 $\times 2$                          | 2.699(8)   | Mn3-O2 $\times 2$         | 2.801(8)             |
| Bi-O4 $\times 4$                          | 2.657(8)   | BVS(Mn3)                  | +2.79                |
| BVS(Bi)                                   | +2.57      | <b>Mn4</b> -O4 $\times 2$ | 1.937(5)             |
| Mn1-O2 $\times 2$                         | 1.935(7)   | <b>Mn4</b> -O2 $\times 2$ | 1.993(3)             |
| Mn1-O3 $\times 2$                         | 1.923(8)   | <b>Mn4</b> -O1 $\times 2$ | 2.017(6)             |
| Mn1-O1 $\times 4$                         | 2.789(8)   | BVS(Mn4)                  | +3.30                |
| BVS(Mn1)                                  | +2.78      | $\Delta$ (Mn4)            | $2.9 \times 10^{-4}$ |
| Mn2-O1 $\times 4$                         | 1.918(7)   | <b>Mn5</b> -O1 $\times 2$ | 1.970(6)             |
| Mn2-O4 $\times 4$                         | 0.763(4)   | <b>Mn5</b> -O3 $\times 2$ | 1.988(3)             |
| BVS(Mn2)                                  | +2.86      | <b>Mn5</b> -O4 $\times 2$ | 2.046(5)             |
|                                           |            | BVS(Mn5)                  | +3.14                |
|                                           |            | $\Delta$ (Mn5)            | $2.6 \times 10^{-4}$ |
| <i>T</i> = 400 K, space group <i>Im-3</i> |            |                           |                      |
| Bi-O $\times 12$                          | 2.6604(10) | Mn1-O $\times 4$          | 1.9264(11)           |
| BVS(Bi)                                   | +2.57      | Mn1-O $\times 4$          | 2.7932(11)           |
|                                           |            | BVS(Mn1)                  | +2.80                |
|                                           |            | <b>Mn2</b> -O $\times 6$  | 1.9932(4)            |
|                                           |            | BVS(Mn2)                  | +3.19                |

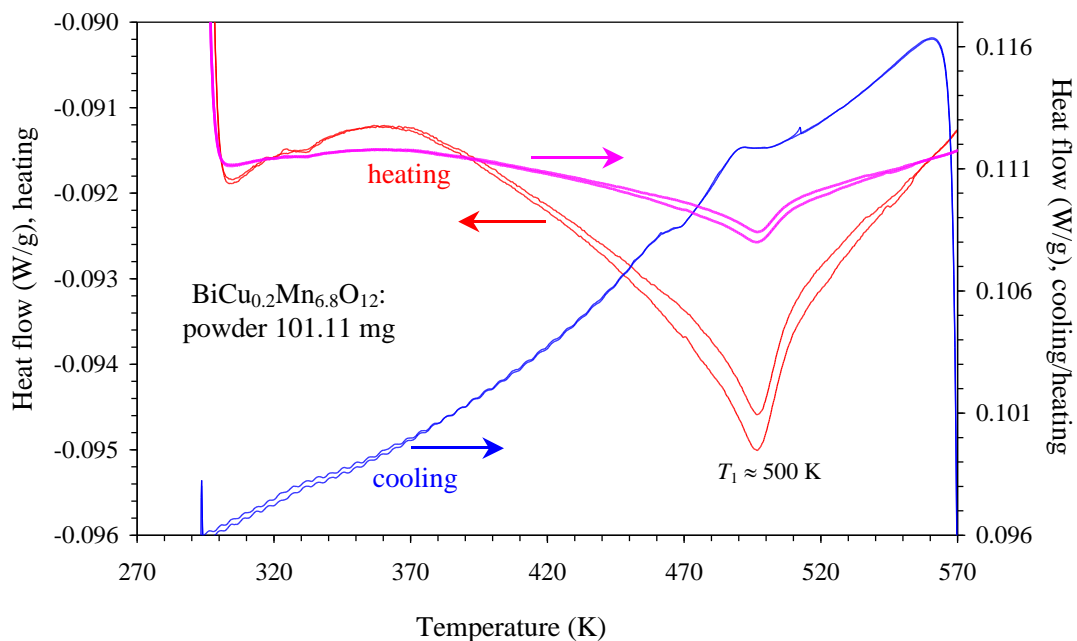

**Figure S1a.** DSC curves of BiCu<sub>0.2</sub>Mn<sub>6.8</sub>O<sub>12</sub> (two runs) on heating (red; left-hand axis) and cooling (blue; right-hand axis) at 10 K/min. Small bumps near 470 K on cooling curves are instrumental artifacts. Shifted (by +0.203 W/g) heating curves are also plotted (pink color) using the right-hand axis to show the heating-cooling curves on the same scale.

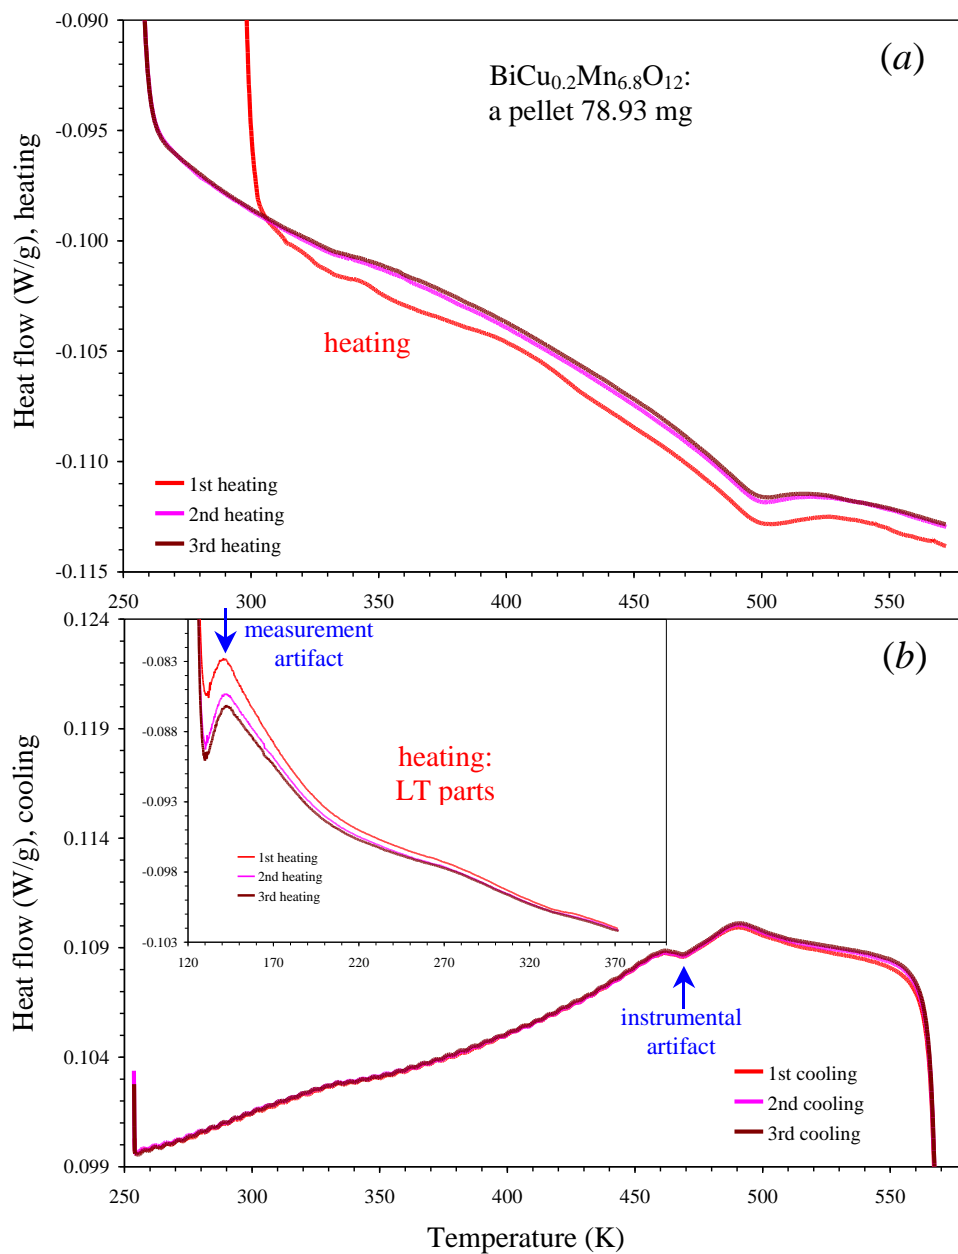

**Figure S1b.** DSC curves of  $\text{BiCu}_{0.2}\text{Mn}_{6.8}\text{O}_{12}$  (three runs; a pellet of 78.93 mg) on (a) heating and (b) cooling at 10 K/min. Small bumps near 470 K on cooling curves are instrumental artifacts. Inset shows DSC curves from 123 K to 370 K on heating (three runs) to emphasize the absence of low-temperature DSC anomalies.

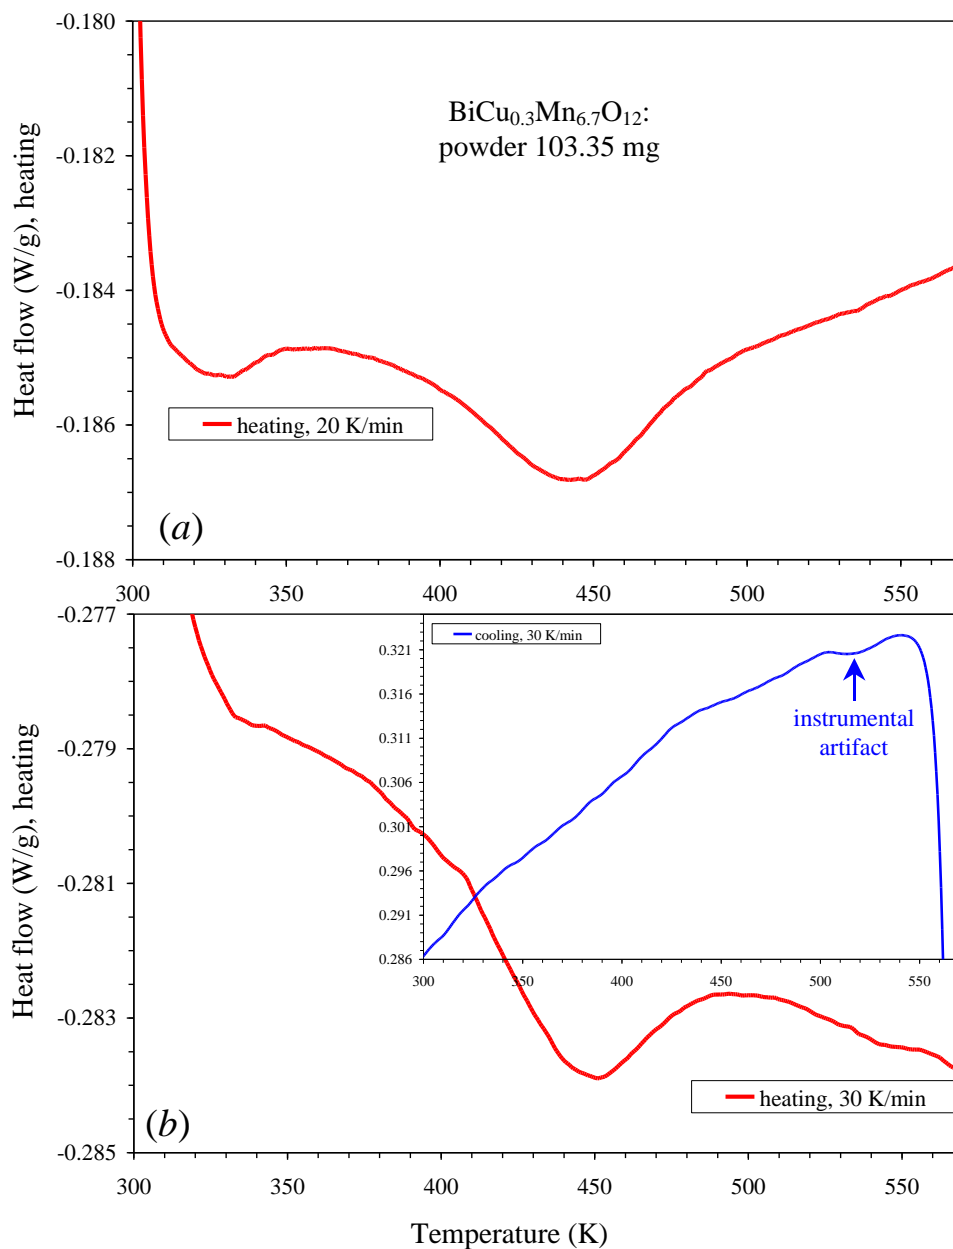

**Figure S1c.** DSC curves of  $\text{BiCu}_{0.3}\text{Mn}_{6.7}\text{O}_{12}$  (powder sample of 103.35 mg) on (a) heating with 20 K/min and (b) on heating with 30 K/min. Inset shows a DSC curve on cooling with 30 K/min.

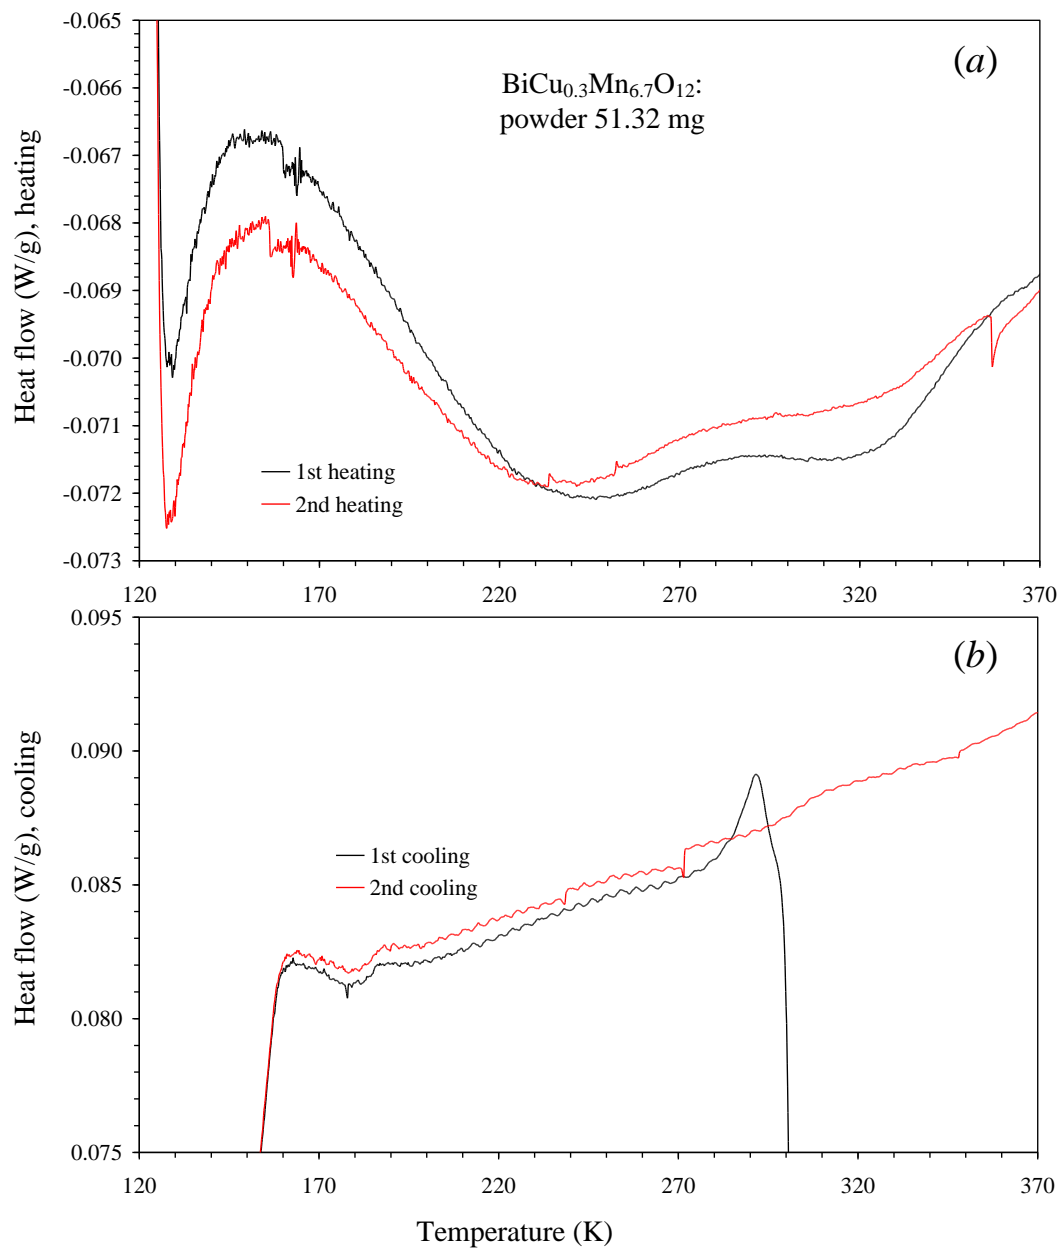

**Figure S1d.** DSC curves of  $\text{BiCu}_{0.3}\text{Mn}_{6.7}\text{O}_{12}$  (two runs, powder sample of 51.32 mg) on (a) heating and (b) cooling with 10 K/min in low-temperature regions.



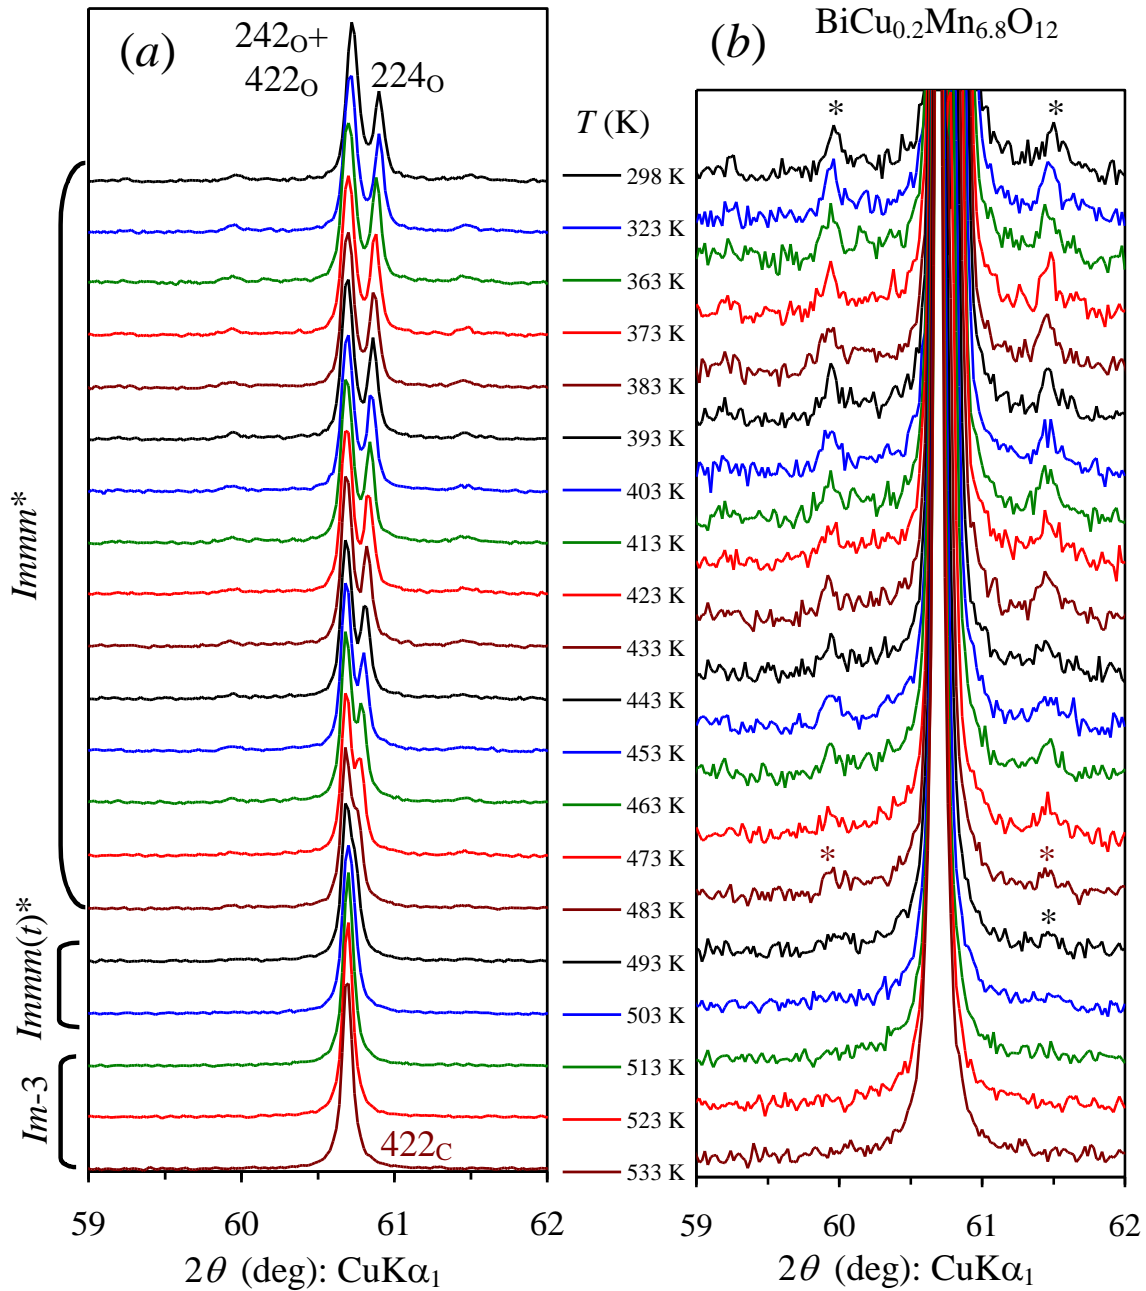

**Figure S2.** High-temperature laboratory X-ray powder diffraction patterns of  $\text{BiCu}_{0.2}\text{Mn}_{6.8}\text{O}_{12}$ . Fragments of diffraction patterns near the  $422$  cubic reflection are shown. Reflection indexes for the  $Immm$  orthorhombic (O) and  $Im-3$  cubic (C) space groups are given. The panel (b) shows the zoomed part of panel (a) to emphasize the incommensurately modulated reflections (marked by the stars). Very weak incommensurately modulated reflections were still observed at 493 K, where the  $a_0$  and  $b_0$  lattice parameters already merge. Measurements were performed on heating.

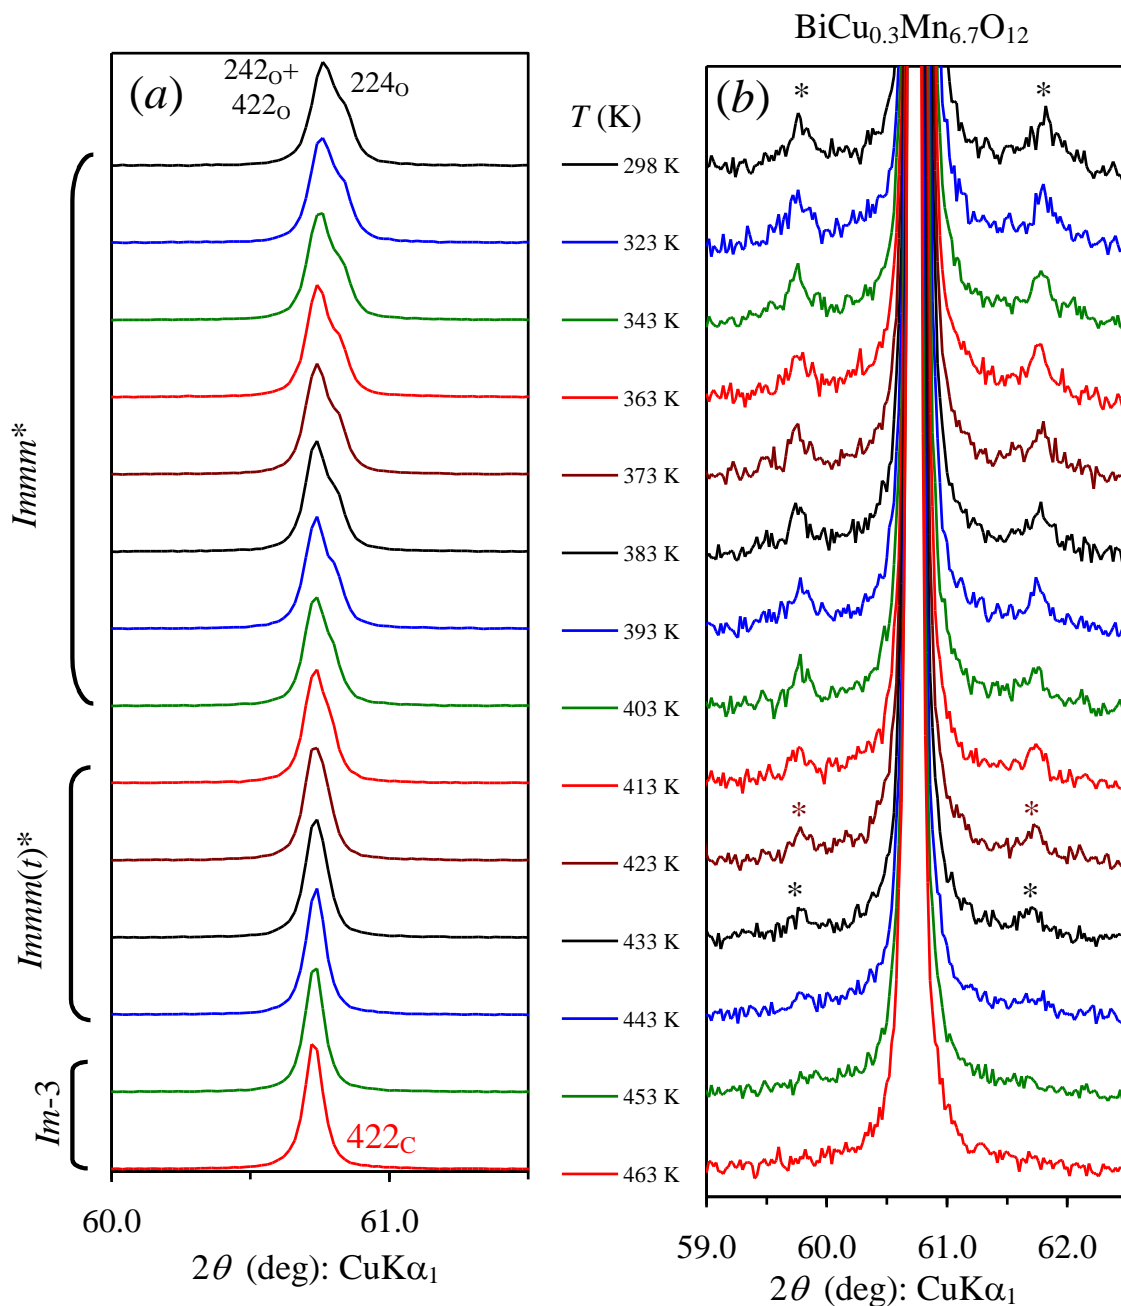

**Figure S3.** High-temperature laboratory X-ray powder diffraction patterns of  $\text{BiCu}_{0.3}\text{Mn}_{6.7}\text{O}_{12}$ . Fragments of diffraction patterns near the  $422$  cubic reflection are shown. Reflection indexes for the  $\text{Immm}^*$  orthorhombic (O) and  $\text{Im-3}$  cubic (C) space groups are given. The panel (b) shows the zoomed part of panel (a) to emphasize the incommensurately modulated reflections (marked by the stars). Weak incommensurately modulated reflections were still observed at  $413$ – $443$  K, where the  $a_0$  and  $b_0$  lattice parameters already merge. Measurements were performed on heating.

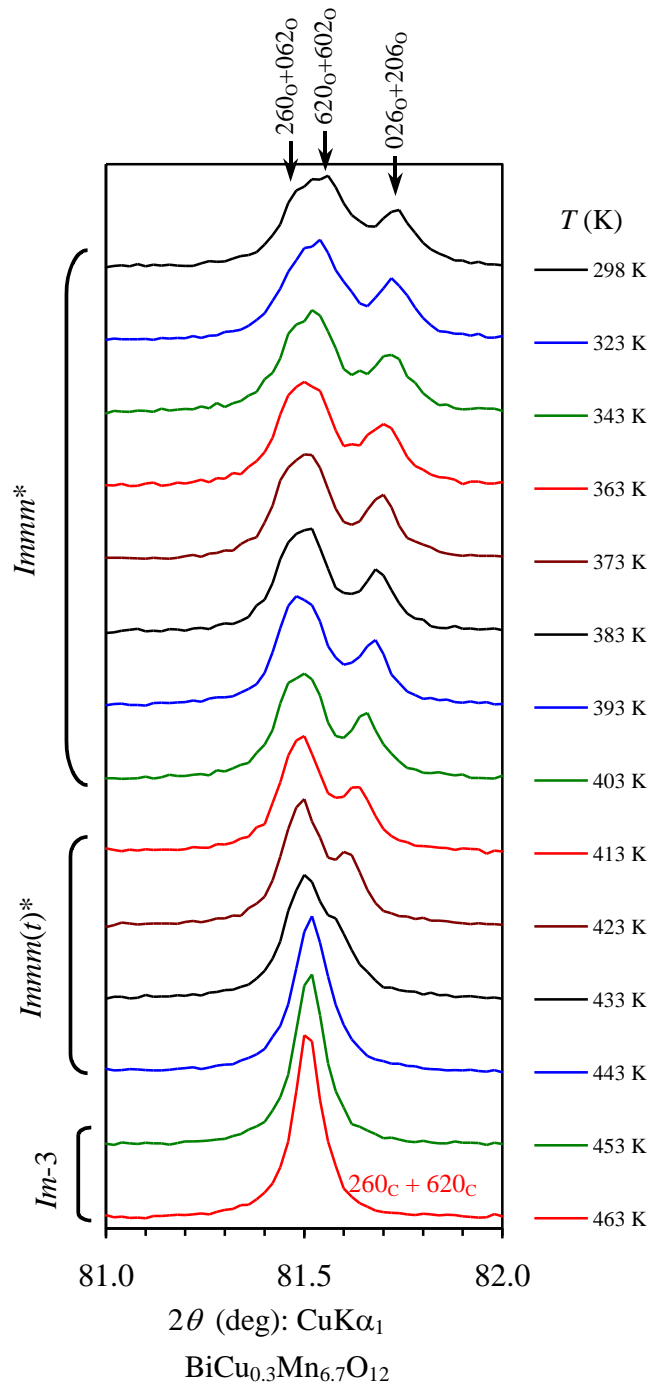

**Figure S4.** High-temperature laboratory X-ray powder diffraction patterns of  $\text{BiCu}_{0.3}\text{Mn}_{6.7}\text{O}_{12}$ . Fragments of diffraction patterns near the 260 and 620 cubic reflections are shown. Reflection indexes for the  $Immm^*$  orthorhombic (O) and  $Im-3$  cubic (C) space groups are given. Measurements were performed on heating. This figure illustrates that  $a_0$ ,  $b_0$  and  $c_0$  are different in the  $Immm^*$  phase, but  $a_0$  and  $b_0$  merge in the  $Immm(t)^*$  phase, and all  $a_0$ ,  $b_0$  and  $c_0$  merge in the cubic  $Im-3$  phase.

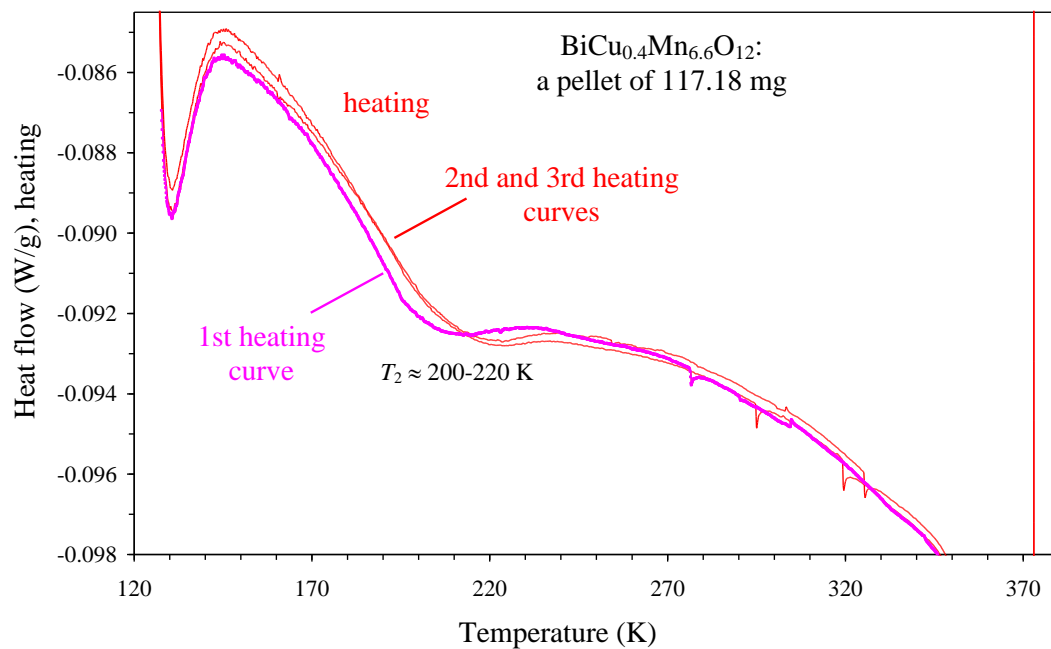

**Figure S5.** Details of the DSC curves of  $\text{BiCu}_{0.4}\text{Mn}_{6.6}\text{O}_{12}$  (three runs) on heating in a low-temperature region.

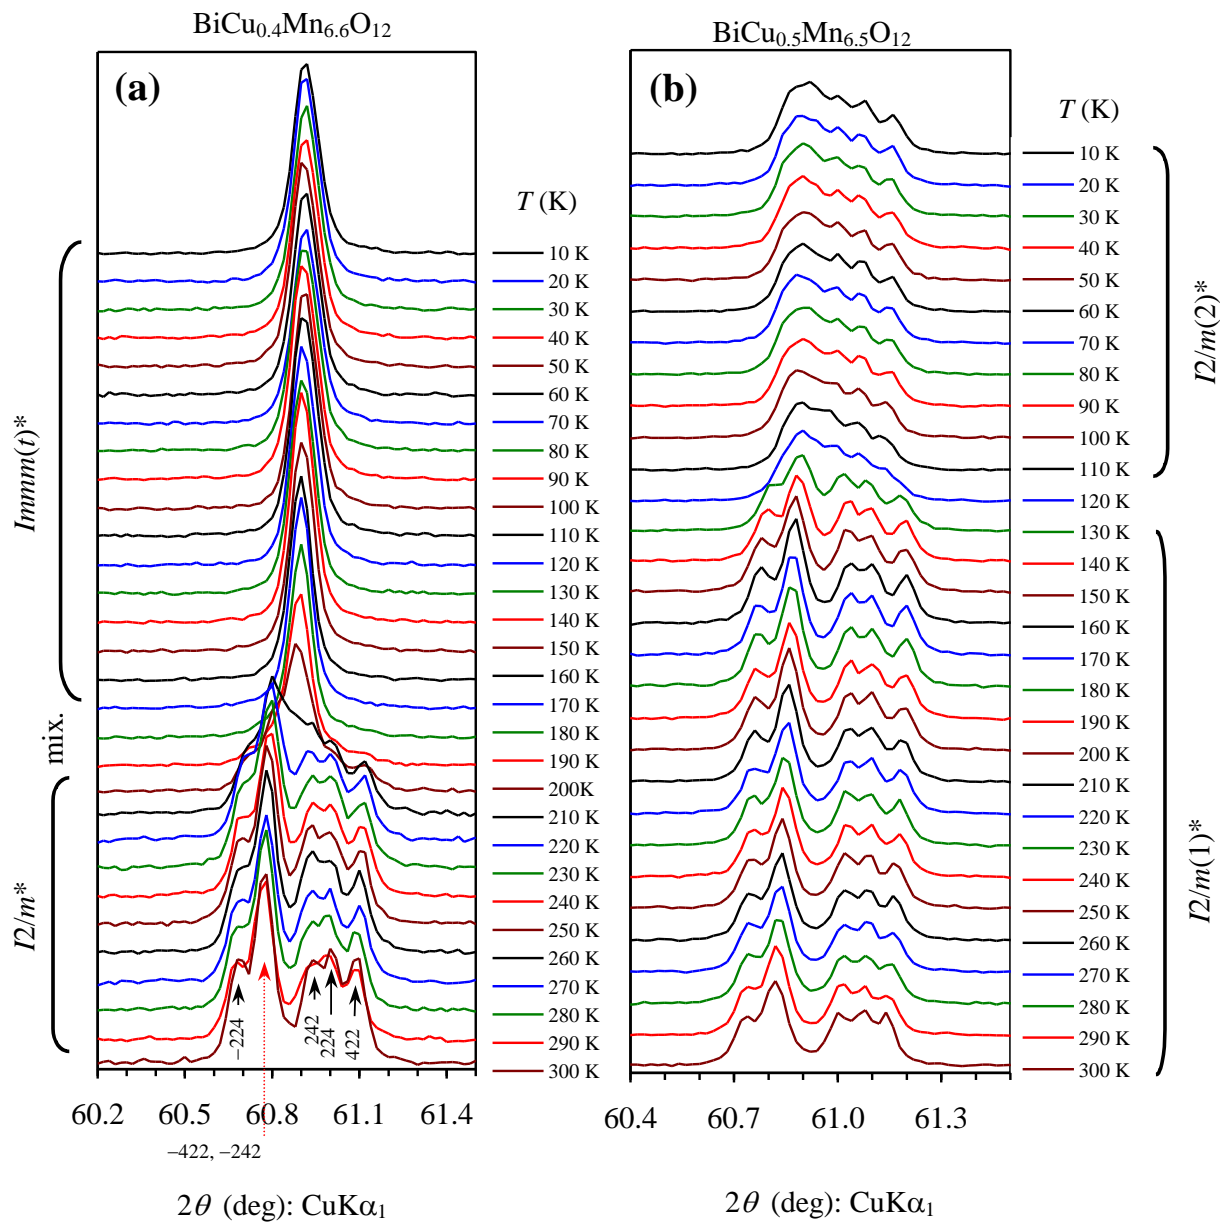

**Figure S6.** Low-temperature laboratory X-ray powder diffraction patterns of (a)  $\text{BiCu}_{0.4}\text{Mn}_{6.6}\text{O}_{12}$  and (b)  $\text{BiCu}_{0.5}\text{Mn}_{6.5}\text{O}_{12}$  between 10 K and 300 K with a step of 10 K. Fragments of diffraction patterns near the 422 cubic reflection are shown. Reflection indexes for the monoclinic  $I2/m$  space group are given. Measurements were performed on heating.

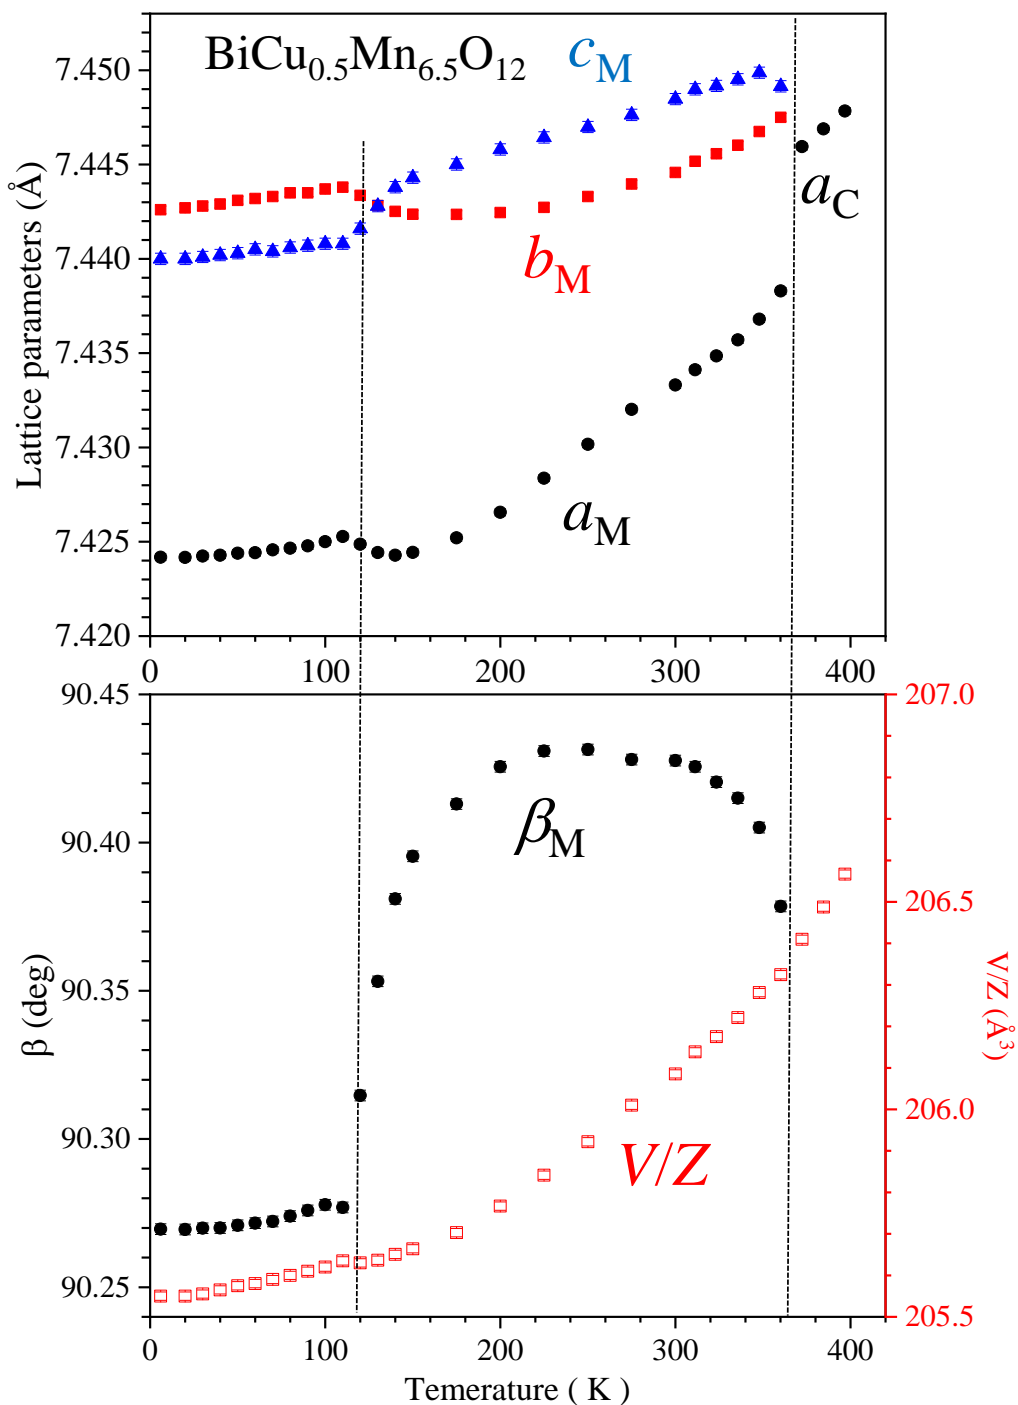

**Figure S7.** Temperature dependence of (a) the lattice parameters and (b) monoclinic  $\beta$  angle (left-hand axis) and the normalized unit-cell volume ( $V/Z$ ) (right-hand axis) in  $\text{BiCu}_{0.5}\text{Mn}_{6.5}\text{O}_{12}$  from neutron diffraction data. Measurements were performed on heating.

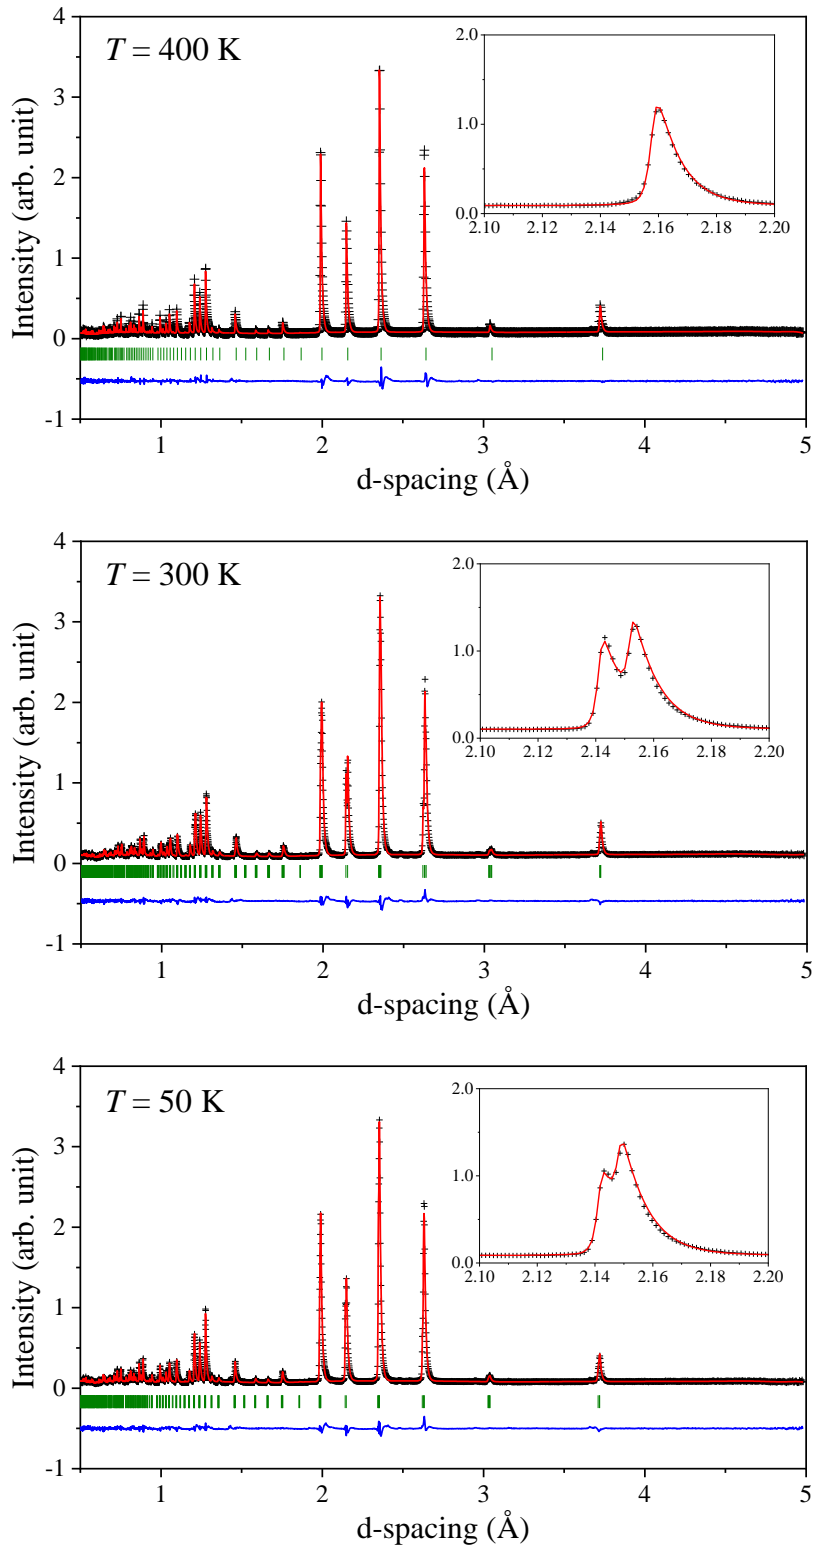

**Figure S8.** Experimental (crosses), calculated (red lines), and difference neutron diffraction patterns of  $\text{BiCu}_{0.5}\text{Mn}_{6.5}\text{O}_{12}$  at 50 K (bottom, space group  $I2/m$ ), 300 K (middle, space group  $I2/m$ ), and 400 K (top, space group  $Im\bar{3}$ ) after the Rietveld analysis (see Tables S1 and S2 for the refined structural parameters). Insets show zoomed details.

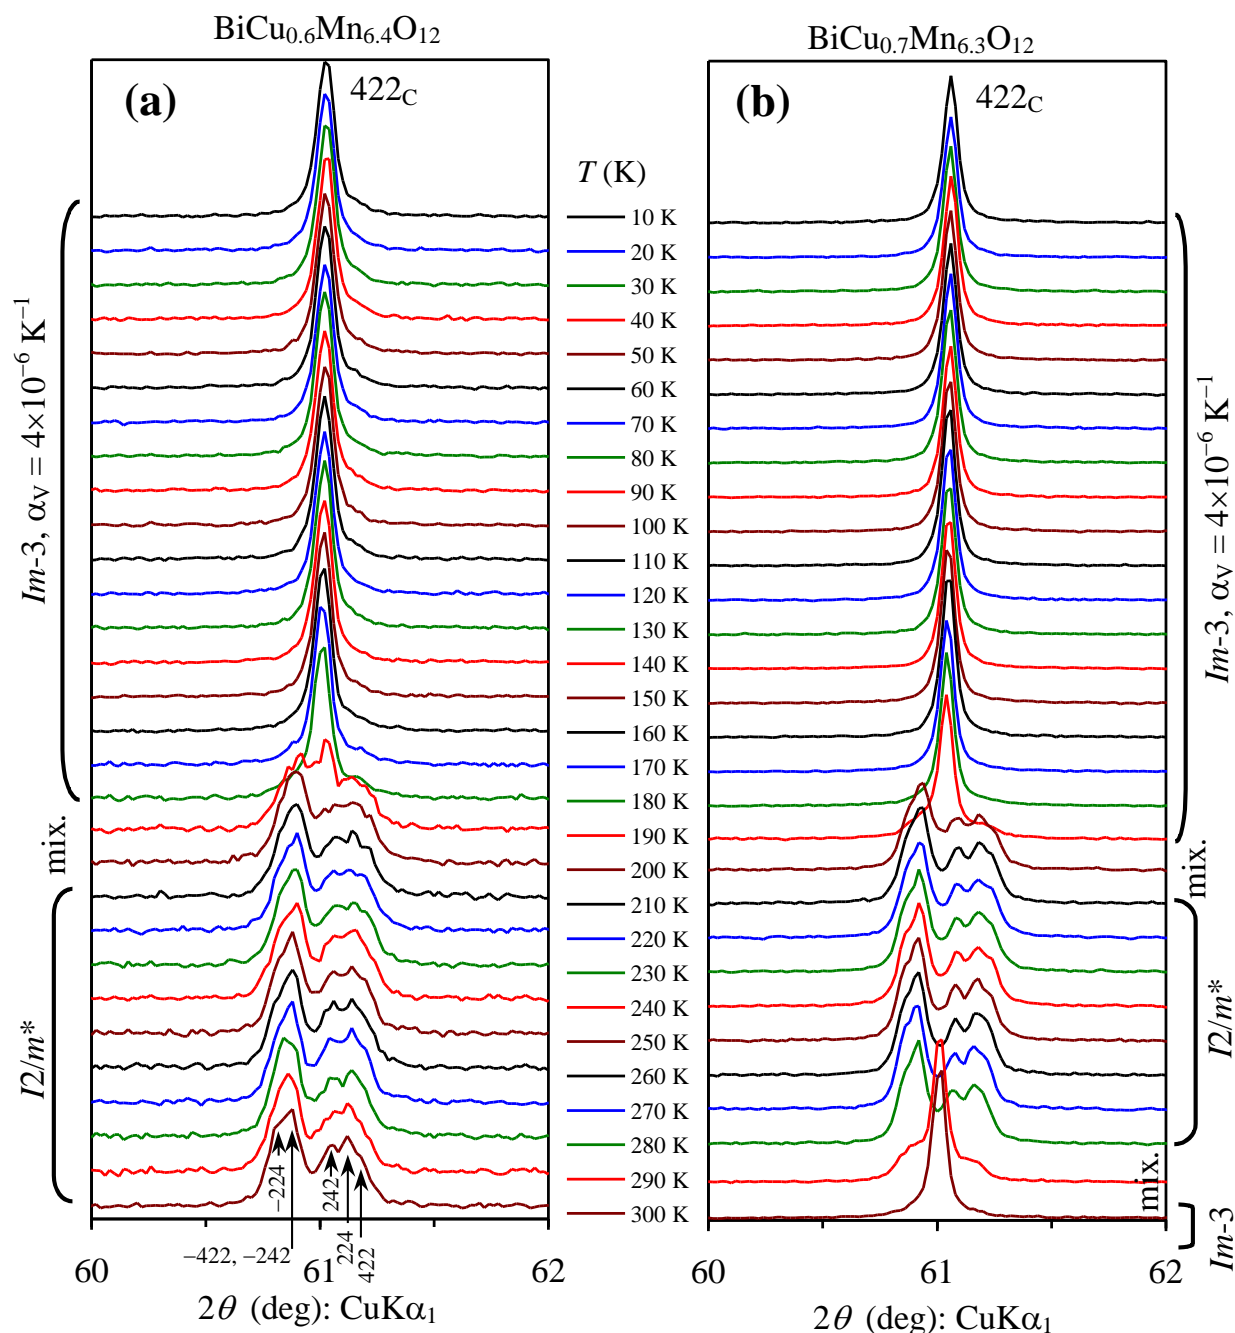

**Figure S9.** Low-temperature laboratory X-ray powder diffraction patterns of (a)  $\text{BiCu}_{0.6}\text{Mn}_{6.4}\text{O}_{12}$  and (b)  $\text{BiCu}_{0.7}\text{Mn}_{6.3}\text{O}_{12}$  between 10 K and 300 K with a step of 10 K. Fragments of diffraction patterns near the  $422_{\text{C}}$  cubic reflection ( $422_{\text{C}}$ ) are shown. Reflection indexes for the monoclinic  $I2/m^*$  space group are given. Measurements were performed on heating.

$\alpha_{\text{V}} (= (1/V) \cdot \Delta V / \Delta T)$  is the volumetric coefficient of thermal expansion for the low-temperature  $Im-3$  cubic phase.



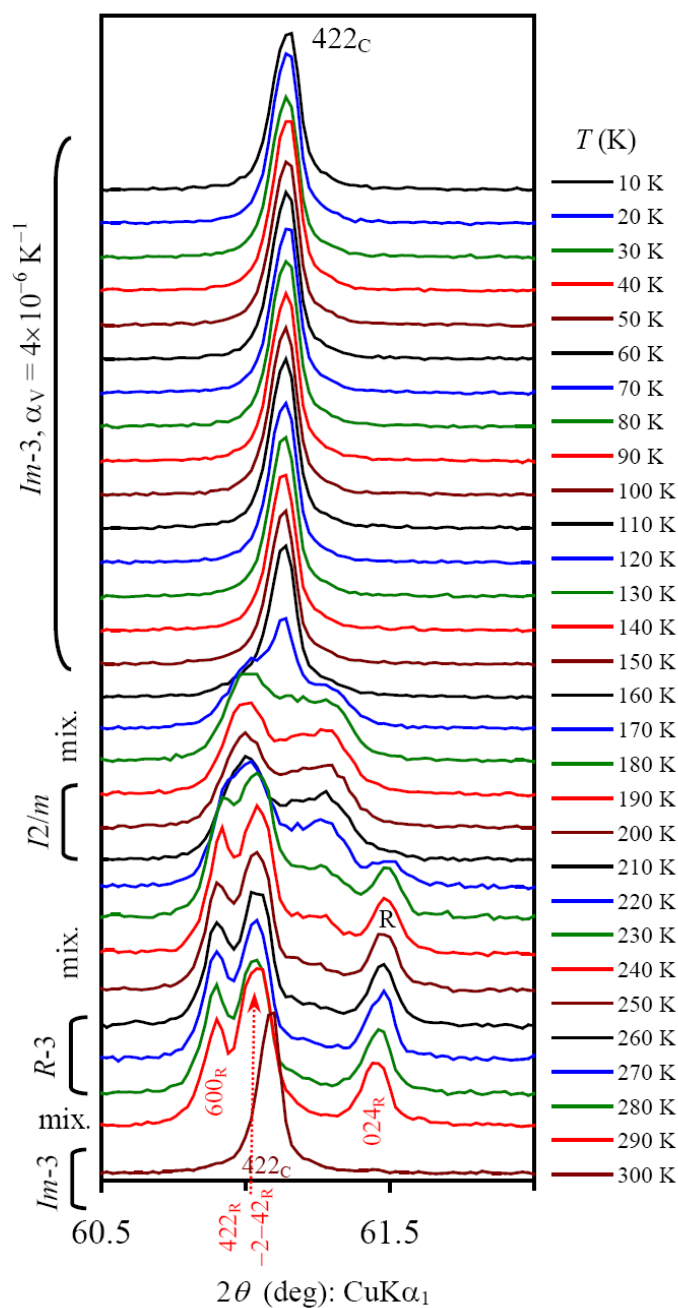

**Figure S10.** Low-temperature laboratory X-ray powder diffraction patterns of  $\text{BiCu}_{0.8}\text{Mn}_{6.2}\text{O}_{12}$  between 10 K and 300 K with a step of 10 K. Fragments of diffraction patterns near the 422 cubic reflection ( $422_c$ ) are shown. R denotes a characteristic reflection from the  $R-3$  phase. Indexes of reflections for the  $R-3$  phase are given. Measurements were performed on heating.  
 $\alpha_V (= (1/V) \cdot \Delta V / \Delta T)$  is the volumetric coefficient of thermal expansion for the low-temperature  $I_{m-3}$  cubic phase.

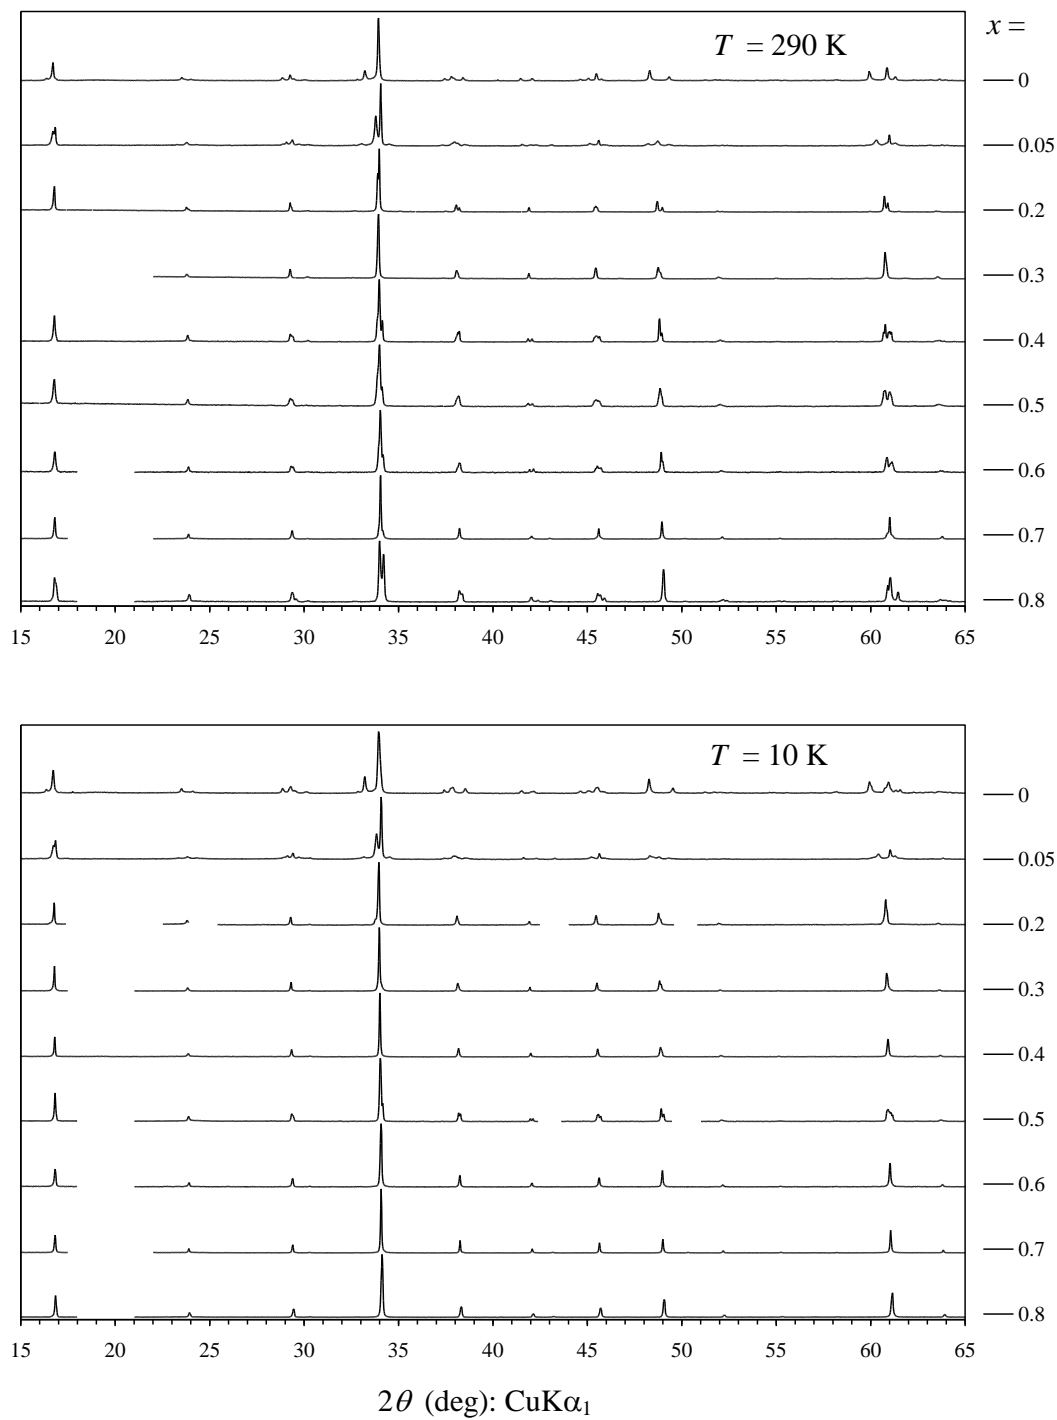

**Figure S11a.** Laboratory X-ray powder diffraction patterns of  $\text{BiCu}_x\text{Mn}_{7-x}\text{O}_{12}$  (a) at 290 K and (b) at 10 K. Regions containing artifact reflections (from grease and/or Cu holder) were removed.

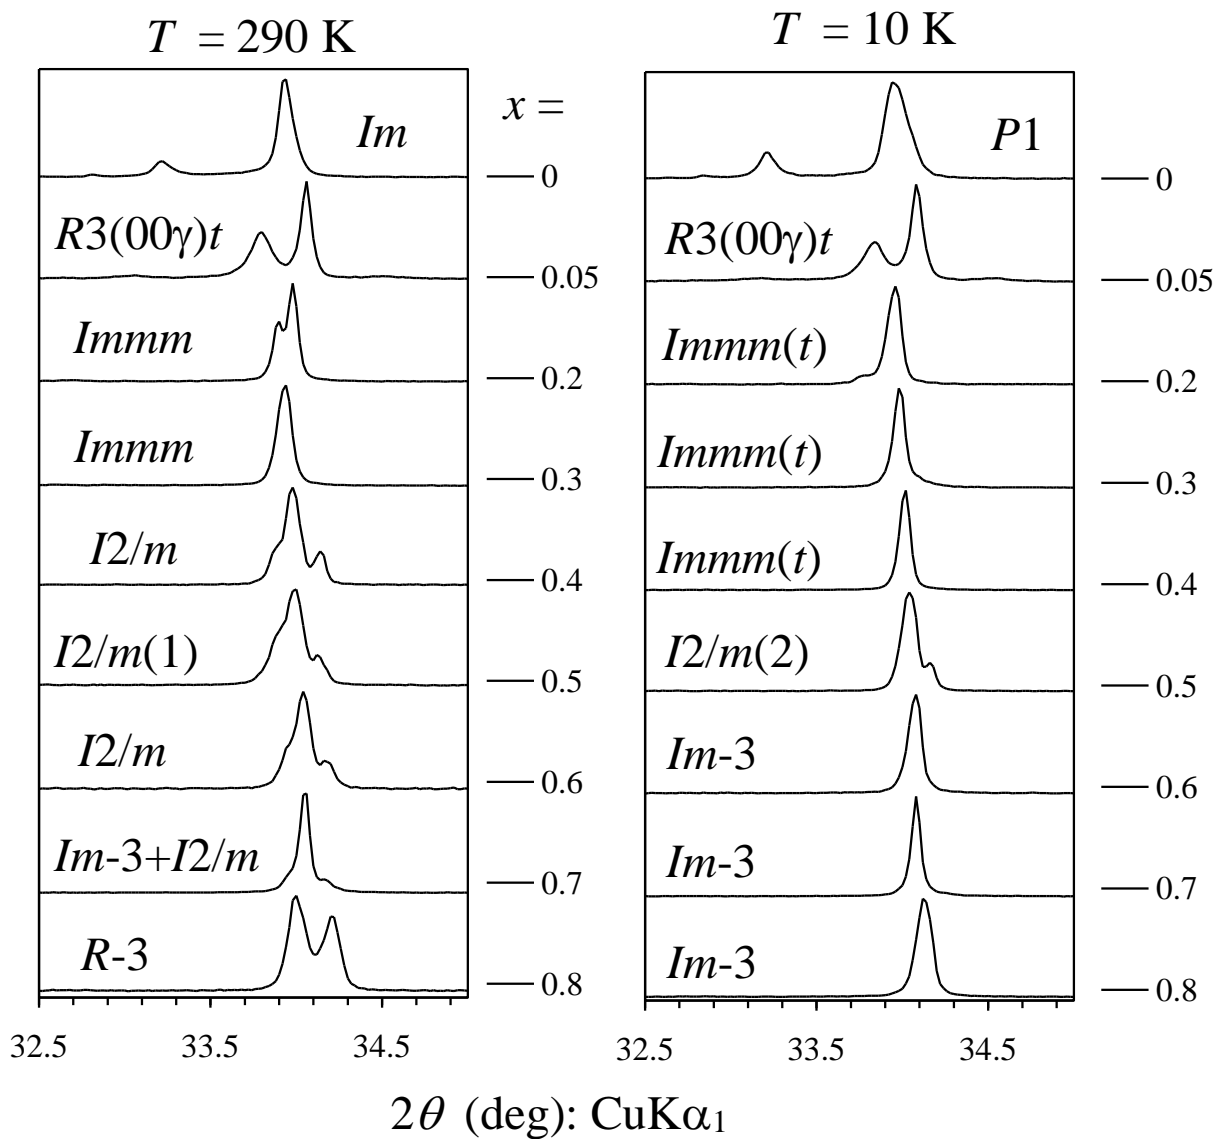

**Figure S11b.** Fragments of laboratory X-ray powder diffraction patterns of  $\text{BiCu}_x\text{Mn}_{7-x}\text{O}_{12}$  at 290 K (left) and at 10 K (right) near the strongest reflections.

Table S3 Temperature dependence of the lattice parameters in

$\text{BiCu}_{0.2}\text{Mn}_{6.8}\text{O}_{12}$  (space group *Immm*) from laboratory X-ray diffraction

| $T$ (K) | $a$ (Å) | $b$ (Å) | $c$ (Å) | $V$ (Å <sup>3</sup> ) |
|---------|---------|---------|---------|-----------------------|
| 4       | 7.4524  | 7.4560  | 7.4385  | 413.323               |
| 10      | 7.4523  | 7.4548  | 7.4380  | 413.224               |
| 20      | 7.4516  | 7.4544  | 7.4377  | 413.144               |
| 30      | 7.4526  | 7.4559  | 7.4388  | 413.336               |
| 40      | 7.4528  | 7.4558  | 7.4387  | 413.342               |
| 50      | 7.4529  | 7.4556  | 7.4388  | 413.345               |
| 60      | 7.4522  | 7.4553  | 7.4383  | 413.260               |
| 70      | 7.4532  | 7.4558  | 7.4391  | 413.388               |
| 80      | 7.4537  | 7.4569  | 7.4396  | 413.507               |
| 90      | 7.4528  | 7.4551  | 7.4384  | 413.284               |
| 100     | 7.4539  | 7.4548  | 7.4390  | 413.362               |
| 110     | 7.4545  | 7.4554  | 7.4391  | 413.436               |
| 120     | 7.4534  | 7.4562  | 7.4388  | 413.405               |
| 130     | 7.4543  | 7.4575  | 7.4398  | 413.582               |
| 140     | 7.4538  | 7.4574  | 7.4394  | 413.531               |
| 150     | 7.4547  | 7.4573  | 7.4397  | 413.589               |
| 160     | 7.4552  | 7.4589  | 7.4401  | 413.724               |
| 170     | 7.4560  | 7.4601  | 7.4407  | 413.866               |
| 180     | 7.4560  | 7.4585  | 7.4399  | 413.733               |
| 190     | 7.4558  | 7.4588  | 7.4397  | 413.730               |
| 200     | 7.4562  | 7.4602  | 7.4397  | 413.831               |
| 210     | 7.4577  | 7.4620  | 7.4402  | 414.038               |
| 220     | 7.4578  | 7.4622  | 7.4394  | 414.019               |
| 230     | 7.4587  | 7.4634  | 7.4392  | 414.123               |
| 240     | 7.4592  | 7.4639  | 7.4379  | 414.097               |
| 250     | 7.4585  | 7.4628  | 7.4357  | 413.878               |
| 260     | 7.4599  | 7.4651  | 7.4353  | 414.062               |
| 270     | 7.4606  | 7.4655  | 7.4338  | 414.039               |
| 280     | 7.4616  | 7.4671  | 7.4330  | 414.139               |
| 290     | 7.4622  | 7.4685  | 7.4323  | 414.218               |
| 300     | 7.4618  | 7.4682  | 7.4300  | 414.046               |

$\text{BiCu}_{0.2}\text{Mn}_{6.8}\text{O}_{12}$  (space group *Immm* and *Im-3*) from laboratory X-ray diffraction

| $T$ (K) | $a$ (Å) | $b$ (Å) | $c$ (Å) | $V$ (Å <sup>3</sup> ) | $a_c$ (Å) | $V_c$ (Å <sup>3</sup> ) |
|---------|---------|---------|---------|-----------------------|-----------|-------------------------|
| 298     | 7.4642  | 7.4702  | 7.4293  | 414.245               |           |                         |
| 323     | 7.4655  | 7.4725  | 7.4284  | 414.400               |           |                         |
| 343     | 7.4663  | 7.4733  | 7.4291  | 414.529               |           |                         |
| 353     | 7.4665  | 7.4736  | 7.4298  | 414.593               |           |                         |
| 363     | 7.4667  | 7.4737  | 7.4307  | 414.660               |           |                         |
| 373     | 7.4669  | 7.4736  | 7.4317  | 414.726               |           |                         |
| 383     | 7.4672  | 7.4735  | 7.4329  | 414.800               |           |                         |
| 393     | 7.4672  | 7.4736  | 7.4342  | 414.879               |           |                         |
| 403     | 7.4673  | 7.4732  | 7.4356  | 414.943               |           |                         |
| 413     | 7.4676  | 7.4731  | 7.4374  | 415.054               |           |                         |
| 423     | 7.4674  | 7.4728  | 7.4388  | 415.102               |           |                         |
| 433     | 7.4674  | 7.4723  | 7.4404  | 415.163               |           |                         |

|     |        |        |        |         |        |         |
|-----|--------|--------|--------|---------|--------|---------|
| 443 | 7.4677 | 7.4717 | 7.4425 | 415.269 |        |         |
| 453 | 7.4677 | 7.4710 | 7.4444 | 415.335 |        |         |
| 463 | 7.4676 | 7.4705 | 7.4466 | 415.421 |        |         |
| 473 | 7.4678 | 7.4693 | 7.4489 | 415.489 |        |         |
| 483 | 7.4678 | 7.4684 | 7.4517 | 415.598 |        |         |
| 493 | 7.4673 | 7.4674 | 7.4543 | 415.663 |        |         |
| 503 | 7.4663 | 7.4662 | 7.4579 | 415.740 |        |         |
| 513 | 7.4643 | 7.4641 | 7.4632 | 415.807 | 7.4639 | 415.809 |
| 523 |        |        |        |         | 7.4643 | 415.873 |
| 533 |        |        |        |         | 7.4647 | 415.948 |
| 543 |        |        |        |         | 7.4651 | 416.015 |
| 553 |        |        |        |         | 7.4656 | 416.098 |
| 563 |        |        |        |         | 7.4661 | 416.177 |
| 573 |        |        |        |         | 7.4665 | 416.247 |
| 583 |        |        |        |         | 7.4670 | 416.331 |
| 593 |        |        |        |         | 7.4676 | 416.428 |
| 603 |        |        |        |         | 7.4680 | 416.501 |
| 613 |        |        |        |         | 7.4686 | 416.600 |
| 623 |        |        |        |         | 7.4691 | 416.680 |

BiCu<sub>0.3</sub>Mn<sub>6.7</sub>O<sub>12</sub> (space group *Immm*) from laboratory X-ray diffraction

| <i>T</i> (K) | <i>a</i> (Å) | <i>b</i> (Å) | <i>c</i> (Å) | <i>V</i> (Å <sup>3</sup> ) |
|--------------|--------------|--------------|--------------|----------------------------|
| 10           | 7.4518       | 7.4503       | 7.4461       | 413.391                    |
| 20           | 7.4507       | 7.4501       | 7.4460       | 413.315                    |
| 30           | 7.4504       | 7.4504       | 7.4458       | 413.301                    |
| 40           | 7.4508       | 7.4520       | 7.4462       | 413.435                    |
| 50           | 7.4510       | 7.4510       | 7.4462       | 413.392                    |
| 60           | 7.4511       | 7.4510       | 7.4467       | 413.425                    |
| 70           | 7.4519       | 7.4510       | 7.4469       | 413.486                    |
| 80           | 7.4513       | 7.4516       | 7.4468       | 413.472                    |
| 90           | 7.4522       | 7.4517       | 7.4470       | 413.540                    |
| 100          | 7.4515       | 7.4513       | 7.4463       | 413.446                    |
| 110          | 7.4518       | 7.4527       | 7.4470       | 413.573                    |
| 120          | 7.4520       | 7.4520       | 7.4472       | 413.566                    |
| 130          | 7.4532       | 7.4517       | 7.4475       | 413.628                    |
| 140          | 7.4526       | 7.4525       | 7.4476       | 413.644                    |
| 150          | 7.4524       | 7.4523       | 7.4472       | 413.597                    |
| 160          | 7.4531       | 7.4527       | 7.4472       | 413.657                    |
| 170          | 7.4518       | 7.4545       | 7.4481       | 413.736                    |
| 180          | 7.4528       | 7.4542       | 7.4475       | 413.746                    |
| 190          | 7.4532       | 7.4543       | 7.4478       | 413.792                    |
| 200          | 7.4534       | 7.4542       | 7.4474       | 413.772                    |
| 210          | 7.4535       | 7.4550       | 7.4475       | 413.826                    |
| 220          | 7.4545       | 7.4559       | 7.4480       | 413.959                    |
| 230          | 7.4542       | 7.4565       | 7.4475       | 413.951                    |
| 240          | 7.4539       | 7.4578       | 7.4470       | 413.979                    |
| 250          | 7.4548       | 7.4591       | 7.4465       | 414.070                    |
| 260          | 7.4555       | 7.4605       | 7.4461       | 414.161                    |
| 270          | 7.4566       | 7.4616       | 7.4459       | 414.273                    |
| 280          | 7.4570       | 7.4620       | 7.4452       | 414.279                    |

290      7.4566      7.4629      7.4441      414.248

BiCu<sub>0.3</sub>Mn<sub>6.7</sub>O<sub>12</sub> (space group *Immm* and *Im-3*) from laboratory X-ray diffraction

| <i>T</i> (K) | <i>a</i> (Å) | <i>b</i> (Å) | <i>c</i> (Å) | <i>V</i> (Å <sup>3</sup> ) | <i>a<sub>c</sub></i> (Å) | <i>V<sub>C</sub></i> (Å <sup>3</sup> ) |
|--------------|--------------|--------------|--------------|----------------------------|--------------------------|----------------------------------------|
| 303          | 7.4576       | 7.4643       | 7.4433       | 414.334                    |                          |                                        |
| 313          | 7.4582       | 7.4645       | 7.4437       | 414.401                    |                          |                                        |
| 323          | 7.4586       | 7.4649       | 7.4440       | 414.464                    |                          |                                        |
| 333          | 7.4590       | 7.4651       | 7.4443       | 414.517                    |                          |                                        |
| 343          | 7.4598       | 7.4655       | 7.4447       | 414.601                    |                          |                                        |
| 353          | 7.4601       | 7.4655       | 7.4451       | 414.647                    |                          |                                        |
| 363          | 7.4606       | 7.4656       | 7.4457       | 414.707                    |                          |                                        |
| 373          | 7.4613       | 7.4657       | 7.4463       | 414.790                    |                          |                                        |
| 383          | 7.4616       | 7.4655       | 7.4470       | 414.838                    |                          |                                        |
| 393          | 7.4622       | 7.4651       | 7.4480       | 414.901                    |                          |                                        |
| 403          | 7.4627       | 7.4650       | 7.4496       | 415.011                    |                          |                                        |
| 413          | 7.4633       | 7.4638       | 7.4510       | 415.051                    |                          |                                        |
| 423          | 7.4630       | 7.4635       | 7.4530       | 415.133                    |                          |                                        |
| 428          | 7.4629       | 7.4631       | 7.4539       | 415.160                    |                          |                                        |
| 433          | 7.4626       | 7.4628       | 7.4550       | 415.184                    |                          |                                        |
| 438          | 7.4623       | 7.4624       | 7.4566       | 415.225                    |                          |                                        |
| 443          | 7.4614       | 7.4616       | 7.4584       | 415.238                    |                          |                                        |
| 448          | 7.4607       | 7.4607       | 7.4607       | 415.278                    | 7.4607                   | 415.274                                |
| 453          |              |              |              |                            | 7.4610                   | 415.326                                |
| 458          |              |              |              |                            | 7.4611                   | 415.340                                |
| 463          |              |              |              |                            | 7.4613                   | 415.371                                |
| 473          |              |              |              |                            | 7.4617                   | 415.441                                |
| 483          |              |              |              |                            | 7.4618                   | 415.465                                |
| 493          |              |              |              |                            | 7.4622                   | 415.532                                |
| 503          |              |              |              |                            | 7.4627                   | 415.612                                |
| 513          |              |              |              |                            | 7.4630                   | 415.654                                |
| 523          |              |              |              |                            | 7.4634                   | 415.720                                |
| 533          |              |              |              |                            | 7.4637                   | 415.771                                |
| 543          |              |              |              |                            | 7.4641                   | 415.837                                |
| 553          |              |              |              |                            | 7.4646                   | 415.928                                |
| 563          |              |              |              |                            | 7.4650                   | 415.988                                |
| 573          |              |              |              |                            | 7.4655                   | 416.077                                |

BiCu<sub>0.4</sub>Mn<sub>6.6</sub>O<sub>12</sub> (space group *Immm*, *I2/m* and *Im-3*) from synchrotron X-ray diffraction data on heating

| <i>T</i> (K) | <i>a<sub>M</sub></i> (Å) | <i>b<sub>M</sub></i> (Å) | <i>c<sub>M</sub></i> (Å) | <i>β<sub>M</sub></i> (deg) | <i>V<sub>M</sub></i> (Å <sup>3</sup> ) | <i>a<sub>C</sub></i> or <i>a<sub>O</sub></i> (Å) | <i>c<sub>O</sub></i> (Å) | Fraction of<br>O or C | <i>V<sub>O</sub></i> or <i>V<sub>C</sub></i> (Å <sup>3</sup> ) |
|--------------|--------------------------|--------------------------|--------------------------|----------------------------|----------------------------------------|--------------------------------------------------|--------------------------|-----------------------|----------------------------------------------------------------|
| 100          |                          |                          |                          |                            |                                        | 7.43583                                          | 7.44327                  | 1                     | 411.962                                                        |
| 110          |                          |                          |                          |                            |                                        | 7.43600                                          | 7.44344                  | 1                     | 411.990                                                        |
| 120          |                          |                          |                          |                            |                                        | 7.43614                                          | 7.44361                  | 1                     | 412.017                                                        |
| 130          |                          |                          |                          |                            |                                        | 7.43626                                          | 7.44377                  | 1                     | 412.041                                                        |
| 135          |                          |                          |                          |                            |                                        | 7.43632                                          | 7.44391                  | 1                     | 412.060                                                        |
| 140          |                          |                          |                          |                            |                                        | 7.43643                                          | 7.44406                  | 1                     | 412.083                                                        |
| 145          |                          |                          |                          |                            |                                        | 7.43653                                          | 7.44420                  | 1                     | 412.104                                                        |
| 150          |                          |                          |                          |                            |                                        | 7.43659                                          | 7.44434                  | 1                     | 412.122                                                        |
| 155          |                          |                          |                          |                            |                                        | 7.43660                                          | 7.44445                  | 1                     | 412.135                                                        |

|     |                |         |         |         |         |                |         |         |         |         |
|-----|----------------|---------|---------|---------|---------|----------------|---------|---------|---------|---------|
| 160 |                |         |         |         |         | 7.43669        | 7.44456 | 1       | 412.152 |         |
| 165 |                |         |         |         |         | 7.43676        | 7.44465 | 1       | 412.166 |         |
| 170 |                |         |         |         |         | 7.43698        | 7.44471 | 1       | 412.185 |         |
| 175 |                |         |         |         |         | 7.43717        | 7.44477 | 1       | 412.202 |         |
| 180 |                |         |         |         |         | 7.43730        | 7.44485 | 1       | 412.218 |         |
| 185 |                |         |         |         |         | 7.43740        | 7.44505 | 1       | 412.246 |         |
| 190 | fixed at 195 K |         |         |         |         |                | 7.43812 | 7.44490 | 0.88    | 412.269 |
| 195 | 7.42569        | 7.45151 | 7.44862 | 90.3705 | 412.143 | 7.43870        | 7.44482 | 0.77    | 412.293 |         |
| 200 | 7.42605        | 7.45128 | 7.44894 | 90.3644 | 412.168 | 7.43914        | 7.44502 | 0.62    | 412.339 |         |
| 205 | 7.42643        | 7.45092 | 7.44922 | 90.3657 | 412.185 | 7.43909        | 7.44538 | 0.48    | 412.376 |         |
| 210 | 7.42683        | 7.45073 | 7.44949 | 90.3692 | 412.211 | 7.43871        | 7.44596 | 0.35    | 412.419 |         |
| 215 | 7.42730        | 7.45055 | 7.44982 | 90.3735 | 412.245 | 7.43807        | 7.44704 | 0.24    | 412.503 |         |
| 220 | 7.42747        | 7.45056 | 7.45026 | 90.3782 | 412.280 | fixed at 215 K |         | 0.14    |         |         |
| 225 | 7.42784        | 7.45054 | 7.45048 | 90.3819 | 412.311 | fixed at 215 K |         | 0.09    |         |         |
| 230 | 7.42821        | 7.45051 | 7.45065 | 90.3854 | 412.339 | fixed at 215 K |         | 0.06    |         |         |
| 240 | 7.42906        | 7.45048 | 7.45095 | 90.3902 | 412.401 |                |         | 0       |         |         |
| 250 | 7.42984        | 7.45047 | 7.45132 | 90.3962 | 412.464 |                |         | 0       |         |         |
| 260 | 7.43066        | 7.45042 | 7.45159 | 90.4009 | 412.521 |                |         | 0       |         |         |
| 270 | 7.43155        | 7.45045 | 7.45192 | 90.4040 | 412.591 |                |         | 0       |         |         |
| 280 | 7.43242        | 7.45049 | 7.45227 | 90.4062 | 412.660 |                |         | 0       |         |         |
| 290 | 7.43330        | 7.45058 | 7.45252 | 90.4075 | 412.728 |                |         | 0       |         |         |
| 300 | 7.43413        | 7.45069 | 7.45278 | 90.4075 | 412.795 |                |         | 0       |         |         |
| 310 | 7.43497        | 7.45088 | 7.45302 | 90.4060 | 412.865 |                |         | 0       |         |         |
| 320 | 7.43584        | 7.45116 | 7.45326 | 90.4031 | 412.942 |                |         | 0       |         |         |
| 330 | 7.43670        | 7.45145 | 7.45343 | 90.3987 | 413.016 |                |         | 0       |         |         |
| 340 | 7.43755        | 7.45183 | 7.45352 | 90.3918 | 413.089 |                |         | 0       |         |         |
| 350 | 7.43832        | 7.45195 | 7.45341 | 90.3806 | 413.133 |                |         | 0       |         |         |
| 360 | fixed at 350 K |         |         |         |         |                | 7.44848 |         | 0.84    | 413.241 |
| 370 |                |         |         |         |         | 7.44888        |         | 1       | 413.307 |         |
| 380 |                |         |         |         |         | 7.44927        |         | 1       | 413.372 |         |
| 400 |                |         |         |         |         | 7.45017        |         | 1       | 413.522 |         |
| 420 |                |         |         |         |         | 7.45105        |         | 1       | 413.668 |         |
| 440 |                |         |         |         |         | 7.45199        |         | 1       | 413.825 |         |
| 460 |                |         |         |         |         | 7.45304        |         | 1       | 414.000 |         |

BiCu<sub>0.5</sub>Mn<sub>6.5</sub>O<sub>12</sub> (space group *I2/m* and *Im-3*) from laboratory X-ray diffraction

| $T$ (K) | $a_M$ (Å) | $b_M$ (Å) | $c_M$ (Å) | $\beta_M$ (deg) | $V_M$ (Å <sup>3</sup> ) |
|---------|-----------|-----------|-----------|-----------------|-------------------------|
| 10      | 7.4230    | 7.4439    | 7.4404    | 90.276          | 411.124                 |
| 20      | 7.4232    | 7.4442    | 7.4405    | 90.274          | 411.158                 |
| 30      | 7.4235    | 7.4444    | 7.4408    | 90.274          | 411.201                 |
| 40      | 7.4232    | 7.4443    | 7.4407    | 90.274          | 411.169                 |
| 50      | 7.4233    | 7.4445    | 7.4409    | 90.275          | 411.201                 |
| 60      | 7.4233    | 7.4447    | 7.4408    | 90.275          | 411.206                 |
| 70      | 7.4237    | 7.4450    | 7.4413    | 90.276          | 411.272                 |
| 80      | 7.4234    | 7.4447    | 7.4411    | 90.275          | 411.228                 |
| 90      | 7.4236    | 7.4449    | 7.4410    | 90.273          | 411.244                 |
| 100     | 7.4244    | 7.4455    | 7.4411    | 90.261          | 411.325                 |
| 110     | 7.4245    | 7.4452    | 7.4405    | 90.249          | 411.279                 |
| 120     | 7.4245    | 7.4450    | 7.4410    | 90.268          | 411.298                 |
| 130     | 7.4232    | 7.4441    | 7.4434    | 90.344          | 411.308                 |

|     |           |        |        |        |                         |
|-----|-----------|--------|--------|--------|-------------------------|
| 140 | 7.4231    | 7.4436 | 7.4445 | 90.379 | 411.333                 |
| 150 | 7.4237    | 7.4437 | 7.4455 | 90.397 | 411.432                 |
| 160 | 7.4238    | 7.4432 | 7.4457 | 90.406 | 411.413                 |
| 170 | 7.4243    | 7.4433 | 7.4460 | 90.413 | 411.465                 |
| 180 | 7.4247    | 7.4433 | 7.4462 | 90.419 | 411.498                 |
| 190 | 7.4252    | 7.4433 | 7.4463 | 90.424 | 411.527                 |
| 200 | 7.4257    | 7.4434 | 7.4466 | 90.429 | 411.583                 |
| 210 | 7.4265    | 7.4435 | 7.4469 | 90.429 | 411.647                 |
| 220 | 7.4271    | 7.4434 | 7.4469 | 90.433 | 411.678                 |
| 230 | 7.4279    | 7.4438 | 7.4472 | 90.433 | 411.759                 |
| 240 | 7.4284    | 7.4437 | 7.4470 | 90.435 | 411.772                 |
| 250 | 7.4295    | 7.4442 | 7.4478 | 90.434 | 411.902                 |
| 260 | 7.4301    | 7.4445 | 7.4479 | 90.433 | 411.949                 |
| 270 | 7.4306    | 7.4445 | 7.4479 | 90.432 | 411.983                 |
| 280 | 7.4312    | 7.4448 | 7.4480 | 90.432 | 412.041                 |
| 290 | 7.4322    | 7.4452 | 7.4488 | 90.428 | 412.164                 |
| 300 | 7.4330    | 7.4455 | 7.4487 | 90.429 | 412.214                 |
| 313 | 7.4340    | 7.4454 | 7.4486 | 90.420 | 412.262                 |
| 323 | 7.4347    | 7.4458 | 7.4490 | 90.417 | 412.343                 |
| 333 | 7.4354    | 7.4461 | 7.4494 | 90.411 | 412.427                 |
| 343 | 7.4362    | 7.4465 | 7.4499 | 90.405 | 412.516                 |
| 353 | 7.4368    | 7.4472 | 7.4500 | 90.397 | 412.596                 |
| 363 | 7.4374    | 7.4475 | 7.4499 | 90.378 | 412.643                 |
|     | $a_c$ (Å) |        |        |        | $V_c$ (Å <sup>3</sup> ) |
| 373 | 7.4455    |        |        |        | 412.738                 |
| 383 | 7.4459    |        |        |        | 412.808                 |
| 393 | 7.4463    |        |        |        | 412.876                 |
| 403 | 7.4468    |        |        |        | 412.959                 |
| 413 | 7.4472    |        |        |        | 413.021                 |
| 423 | 7.4476    |        |        |        | 413.101                 |
| 433 | 7.4483    |        |        |        | 413.204                 |
| 453 | 7.4492    |        |        |        | 413.354                 |
| 463 | 7.4497    |        |        |        | 413.440                 |
| 473 | 7.4502    |        |        |        | 413.524                 |
| 483 | 7.4507    |        |        |        | 413.602                 |
| 493 | 7.4511    |        |        |        | 413.683                 |
| 503 | 7.4516    |        |        |        | 413.767                 |
| 513 | 7.4523    |        |        |        | 413.872                 |
| 523 | 7.4527    |        |        |        | 413.942                 |

**BiCu<sub>0.6</sub>Mn<sub>6.4</sub>O<sub>12</sub> (space group *Im-3* and *I2/m*) from laboratory X-ray diffraction**

| $T$ (K) | $a_c$ (Å) | $V_c$ (Å <sup>3</sup> ) | $a_M$ (Å) | $b_M$ (Å) | $c_M$ (Å) | $\beta_M$ (deg) | $V_M$ (Å <sup>3</sup> ) | Fraction of M |
|---------|-----------|-------------------------|-----------|-----------|-----------|-----------------|-------------------------|---------------|
| 10      | 7.4283    | 409.884                 |           |           |           |                 |                         | 0             |
| 20      | 7.4284    | 409.912                 |           |           |           |                 |                         | 0             |
| 30      | 7.4280    | 409.841                 |           |           |           |                 |                         | 0             |
| 40      | 7.4281    | 409.851                 |           |           |           |                 |                         | 0             |
| 50      | 7.4284    | 409.912                 |           |           |           |                 |                         | 0             |
| 60      | 7.4288    | 409.967                 |           |           |           |                 |                         | 0             |
| 70      | 7.4288    | 409.967                 |           |           |           |                 |                         | 0             |
| 80      | 7.4290    | 409.999                 |           |           |           |                 |                         | 0             |



|     |        |         |        |        |        |        |         |  |      |
|-----|--------|---------|--------|--------|--------|--------|---------|--|------|
| 90  | 7.4289 | 409.990 |        |        |        |        |         |  | 0    |
| 100 | 7.4287 | 409.962 |        |        |        |        |         |  | 0    |
| 110 | 7.4288 | 409.977 |        |        |        |        |         |  | 0    |
| 120 | 7.4290 | 410.012 |        |        |        |        |         |  | 0    |
| 130 | 7.4291 | 410.020 |        |        |        |        |         |  | 0    |
| 140 | 7.4294 | 410.070 |        |        |        |        |         |  | 0    |
| 150 | 7.4295 | 410.085 |        |        |        |        |         |  | 0    |
| 160 | 7.4296 | 410.105 |        |        |        |        |         |  | 0    |
| 170 | 7.4301 | 410.189 |        |        |        |        |         |  | 0    |
| 180 | 7.4302 | 410.202 |        |        |        |        |         |  | 0.23 |
| 190 | 7.4292 | 410.033 | 7.4189 | 7.4352 | 7.4349 | 90.394 | 410.109 |  | 0.77 |
| 200 |        |         | 7.4197 | 7.4353 | 7.4350 | 90.388 | 410.163 |  | 1    |
| 210 |        |         | 7.4205 | 7.4361 | 7.4355 | 90.395 | 410.274 |  | 1    |
| 220 |        |         | 7.4205 | 7.4361 | 7.4359 | 90.397 | 410.297 |  | 1    |
| 230 |        |         | 7.4206 | 7.4356 | 7.4354 | 90.402 | 410.245 |  | 1    |
| 240 |        |         | 7.4210 | 7.4360 | 7.4362 | 90.403 | 410.338 |  | 1    |
| 250 |        |         | 7.4218 | 7.4368 | 7.4367 | 90.403 | 410.455 |  | 1    |
| 260 |        |         | 7.4227 | 7.4370 | 7.4371 | 90.408 | 410.534 |  | 1    |
| 270 |        |         | 7.4234 | 7.4371 | 7.4370 | 90.398 | 410.578 |  | 1    |
| 280 |        |         | 7.4238 | 7.4372 | 7.4371 | 90.401 | 410.605 |  | 1    |
| 290 |        |         | 7.4246 | 7.4381 | 7.4376 | 90.398 | 410.730 |  | 1    |
| 300 |        |         | 7.4252 | 7.4382 | 7.4377 | 90.394 | 410.774 |  | 1    |

BiCu<sub>0.7</sub>Mn<sub>6.3</sub>O<sub>12</sub> (space group *Im-3* and *I2/m*) from laboratory X-ray diffraction

| T (K) | a <sub>C</sub> (Å) | V <sub>C</sub> (Å <sup>3</sup> ) | a <sub>M</sub> (Å) | b <sub>M</sub> (Å) | c <sub>M</sub> (Å) | β <sub>M</sub> (deg) | V <sub>M</sub> (Å <sup>3</sup> ) | Fraction of M |
|-------|--------------------|----------------------------------|--------------------|--------------------|--------------------|----------------------|----------------------------------|---------------|
| 10    | 7.4228             | 408.975                          |                    |                    |                    |                      |                                  | 0             |
| 20    | 7.4230             | 409.021                          |                    |                    |                    |                      |                                  | 0             |
| 30    | 7.4232             | 409.039                          |                    |                    |                    |                      |                                  | 0             |
| 40    | 7.4226             | 408.950                          |                    |                    |                    |                      |                                  | 0             |
| 50    | 7.4232             | 409.054                          |                    |                    |                    |                      |                                  | 0             |
| 60    | 7.4232             | 409.047                          |                    |                    |                    |                      |                                  | 0             |
| 70    | 7.4230             | 409.014                          |                    |                    |                    |                      |                                  | 0             |
| 80    | 7.4235             | 409.095                          |                    |                    |                    |                      |                                  | 0             |
| 90    | 7.4233             | 409.067                          |                    |                    |                    |                      |                                  | 0             |
| 100   | 7.4237             | 409.130                          |                    |                    |                    |                      |                                  | 0             |
| 110   | 7.4240             | 409.180                          |                    |                    |                    |                      |                                  | 0             |
| 120   | 7.4239             | 409.156                          |                    |                    |                    |                      |                                  | 0             |
| 130   | 7.4237             | 409.135                          |                    |                    |                    |                      |                                  | 0             |
| 140   | 7.4238             | 409.151                          |                    |                    |                    |                      |                                  | 0             |
| 150   | 7.4242             | 409.208                          |                    |                    |                    |                      |                                  | 0             |
| 160   | 7.4239             | 409.163                          |                    |                    |                    |                      |                                  | 0             |
| 170   | 7.4246             | 409.272                          |                    |                    |                    |                      |                                  | 0             |
| 180   | 7.4246             | 409.275                          |                    |                    |                    |                      |                                  | 0             |
| 190   | 7.4251             | 409.355                          | fixed at 200 K     |                    |                    |                      |                                  | 0.21          |
| 200   |                    |                                  | 7.4148             | 7.4309             | 7.4285             | 90.377               | 409.294                          | 1             |
| 210   |                    |                                  | 7.4150             | 7.4315             | 7.4289             | 90.389               | 409.357                          | 1             |
| 220   |                    |                                  | 7.4150             | 7.4316             | 7.4293             | 90.393               | 409.387                          | 1             |
| 230   |                    |                                  | 7.4158             | 7.4320             | 7.4297             | 90.393               | 409.470                          | 1             |
| 240   |                    |                                  | 7.4160             | 7.4320             | 7.4297             | 90.394               | 409.481                          | 1             |
| 250   |                    |                                  | 7.4170             | 7.4327             | 7.4306             | 90.393               | 409.624                          | 1             |

|     |        |         |                |        |        |        |         |      |      |
|-----|--------|---------|----------------|--------|--------|--------|---------|------|------|
| 260 |        |         | 7.4173         | 7.4326 | 7.4301 | 90.390 | 409.614 | 1    |      |
| 270 |        |         | 7.4184         | 7.4334 | 7.4308 | 90.382 | 409.752 | 1    |      |
| 280 |        |         | 7.4185         | 7.4330 | 7.4302 | 90.372 | 409.707 | 1    |      |
| 290 | 7.4287 | 409.960 | 7.4220         | 7.4340 | 7.4312 | 90.380 | 410.007 | 0.45 |      |
| 300 | 7.4284 | 409.899 | fixed at 290 K |        |        |        |         |      | 0.14 |

BiCu<sub>0.8</sub>Mn<sub>6.2</sub>O<sub>12</sub> (space group *Im-3*) from laboratory X-ray diffraction

| <i>T</i> (K) | <i>a<sub>C</sub></i> (Å) | <i>V<sub>C</sub></i> (Å <sup>3</sup> ) |
|--------------|--------------------------|----------------------------------------|
| 10           | 7.4156                   | 407.792                                |
| 20           | 7.4158                   | 407.822                                |
| 30           | 7.4161                   | 407.868                                |
| 40           | 7.4156                   | 407.794                                |
| 50           | 7.4160                   | 407.860                                |
| 60           | 7.4161                   | 407.866                                |
| 70           | 7.4157                   | 407.809                                |
| 80           | 7.4159                   | 407.848                                |
| 90           | 7.4163                   | 407.899                                |
| 100          | 7.4165                   | 407.942                                |
| 110          | 7.4164                   | 407.919                                |
| 120          | 7.4166                   | 407.960                                |
| 130          | 7.4167                   | 407.969                                |
| 140          | 7.4169                   | 408.003                                |
| 150          | 7.4172                   | 408.050                                |
| 160          | 7.4170                   | 408.015                                |

BiCu<sub>0.8</sub>Mn<sub>6.2</sub>O<sub>12</sub> (space group *Im-3*, *I2/m*, *R-3* and *Im-3*) from synchrotron X-ray diffraction

| <i>T</i> (K) | <i>a<sub>C</sub></i> (Å) | <i>V<sub>C</sub></i> (Å <sup>3</sup> ) | <i>a<sub>M</sub></i> (Å) | <i>b<sub>M</sub></i> (Å) | <i>c<sub>M</sub></i> (Å) | <i>β<sub>M</sub></i> (deg) | <i>V<sub>M</sub></i> (Å <sup>3</sup> ) | <i>a<sub>R</sub></i> (Å) | <i>c<sub>R</sub></i> (Å) | <i>V<sub>R</sub></i> (Å <sup>3</sup> ) | fraction of R |
|--------------|--------------------------|----------------------------------------|--------------------------|--------------------------|--------------------------|----------------------------|----------------------------------------|--------------------------|--------------------------|----------------------------------------|---------------|
| 121          | 7.41654                  | 407.947                                |                          |                          |                          |                            |                                        |                          |                          |                                        | 0             |
| 138          | 7.41673                  | 407.979                                |                          |                          |                          |                            |                                        |                          |                          |                                        | 0             |
| 155          | 7.41691                  | 408.008                                |                          |                          |                          |                            |                                        |                          |                          |                                        | 0             |
| 172          | 7.41716                  | 408.050                                |                          |                          |                          |                            |                                        |                          |                          |                                        | 0             |
| 189          | 7.41757                  | 408.117                                |                          |                          |                          |                            |                                        |                          |                          |                                        | 0             |
| 206          |                          |                                        | 7.40629                  | 7.42404                  | 7.42057                  | 90.3943                    | 408.0074                               |                          |                          |                                        | 0             |
| 223          |                          |                                        | 7.40662                  | 7.42495                  | 7.42160                  | 90.4027                    | 408.1318                               |                          |                          |                                        | traces        |
| 241          |                          |                                        | 7.40794                  | 7.42633                  | 7.42316                  | 90.4027                    | 408.3662                               | 10.52358                 | 6.38191                  | 612.0802                               | 0.51          |
| 258          |                          |                                        | 7.40997                  | 7.42763                  | 7.42490                  | 90.3904                    | 408.6460                               | 10.52499                 | 6.38317                  | 612.3651                               | 0.78          |
| 275          |                          |                                        | fixed at                 | 258 K                    |                          |                            |                                        | 10.52604                 | 6.38461                  | 612.6255                               | 0.87          |
| 292          | 7.42260                  | 408.948                                |                          |                          |                          |                            |                                        | 10.52614                 | 6.38629                  | 612.7983                               | 0.65          |
| 300          | 7.42367                  | 409.125                                |                          |                          |                          |                            |                                        |                          |                          |                                        | 0             |
| 300          | 7.42367                  | 409.125                                |                          |                          |                          |                            |                                        |                          |                          |                                        | 0             |
| 320          | 7.42460                  | 409.279                                |                          |                          |                          |                            |                                        |                          |                          |                                        | 0             |
| 330          | 7.42506                  | 409.355                                |                          |                          |                          |                            |                                        |                          |                          |                                        | 0             |
| 340          | 7.42551                  | 409.429                                |                          |                          |                          |                            |                                        |                          |                          |                                        | 0             |
| 360          | 7.42643                  | 409.581                                |                          |                          |                          |                            |                                        |                          |                          |                                        | 0             |
| 380          | 7.42735                  | 409.734                                |                          |                          |                          |                            |                                        |                          |                          |                                        | 0             |
| 400          | 7.42830                  | 409.891                                |                          |                          |                          |                            |                                        |                          |                          |                                        | 0             |
| 420          | 7.42932                  | 410.060                                |                          |                          |                          |                            |                                        |                          |                          |                                        | 0             |
| 440          | 7.43040                  | 410.239                                |                          |                          |                          |                            |                                        |                          |                          |                                        | 0             |
